# Supplementary material
Source: PubMed Central journal article supplement (PMC9856244)
Supplement: NIHMS936374-supplement-supp_PDF.pdf [file NIHMS936374-supplement-supp_PDF.pdf]

## **SUPPLEMENTAL MATERIAL**

## Second Arterial versus Venous Conduits for Multi-Vessel Coronary Artery Bypass Surgery in California

### Supplemental Material

Andrew B. Goldstone, MD, PhD, Peter Chiu, MD, MS, Michael Baiocchi, PhD, Hanjay Wang, MD,  
Bharathi Lingala, PhD, Jack H. Boyd, MD, and Y. Joseph Woo, MD

| <b>Table of Contents</b> |                                                                                                                                                                         | <b>Page</b> |
|--------------------------|-------------------------------------------------------------------------------------------------------------------------------------------------------------------------|-------------|
| Supplemental Methods     | Author contributions                                                                                                                                                    | 3           |
| Supplemental Methods     | Statistical analysis                                                                                                                                                    | 3           |
| Supplemental Methods     | Details of propensity score matching algorithm                                                                                                                          | 3           |
| Supplemental Methods     | Comparison of matched versus unmatched population                                                                                                                       | 3           |
| Supplemental Methods     | Instrumental variable approach to address unmeasured confounding                                                                                                        | 4           |
| Supplemental Methods     | Sensitivity analysis                                                                                                                                                    | 5           |
| Supplemental Methods     | Statistical software and packages used to perform the analysis                                                                                                          | 5           |
| Supplemental Table 1     | Definitions of baseline characteristics                                                                                                                                 | 6           |
| Supplemental Table 2     | Definitions of study endpoints                                                                                                                                          | 10          |
| Supplemental Table 3     | Baseline characteristics of matched vs. unmatched patients for each comparison                                                                                          | 11          |
| Supplemental Table 4     | Baseline characteristics of the study population after propensity score matching stratified by number of diseased vessels                                               | 13          |
| Supplemental Table 5     | Baseline characteristics of the study population before and after near-far matching                                                                                     | 15          |
| Supplemental Table 6     | Baseline characteristics of the study population before and after propensity score matching for comparison of right internal thoracic artery vs. radial artery conduits | 17          |
| Supplemental Figure 1    | Distribution of propensity scores, stratified by number of diseased vessels and comparison of interest                                                                  | 19          |
| Supplemental Figure 2    | Distribution of weights for comparison of second arterial conduit vs. venous conduit and for right internal thoracic artery conduit vs. radial artery conduit           | 20          |
| Supplemental Figure 3    | Distribution of surgeon utilization of second arterial conduits and of patients presenting to surgeons who use second arterial conduits at varying rates                | 21          |
| Supplemental Figure 4    | Use of second arterial conduits over the study period                                                                                                                   | 22          |
| Supplemental Figure 5    | Net survival penalty or benefit of second arterial conduits over time (additional area under the survival curve)                                                        | 23          |
| Supplemental Figure 6    | Mortality and major adverse cardiovascular and cerebrovascular events after coronary artery bypass surgery - instrumental variable analysis                             | 24          |
| Supplemental Figure 7    | Mortality after coronary artery bypass surgery with a second arterial vs. venous conduit stratified by number of diseased vessels                                       | 25          |

| <b>Table of Contents</b> |                                                                                                                                                                        | <b>Page</b> |
|--------------------------|------------------------------------------------------------------------------------------------------------------------------------------------------------------------|-------------|
| Supplemental Figure 8    | Competing risks of myocardial infarction, repeat revascularization, or stroke with death stratified by second arterial conduit type                                    | 26          |
| Supplemental Figure 9    | Competing risks of myocardial infarction, repeat revascularization, or stroke with death among recipients of right internal thoracic artery vs. radial artery conduits | 27          |
| References               | Supplemental references                                                                                                                                                | 28          |

## Supplemental Methods

### Author Contributions

ABG, PC, MB, HW, JHB and YJW designed the study. The data were provided by the California Office for Statewide Health Planning and Development. BL output the data into an analyzable format. ABG and MB analyzed the data. ABG prepared the first draft of the manuscript. All authors substantially contributed to discussion of content and revision of the manuscript prior to submission.

### Statistical Analysis

In this supplementary statistical analysis section, we will: 1) provide specific details regarding our propensity score matching algorithms; 2) discuss differences in our matched and unmatched populations; 3) substantiate and discuss our use of a matching-based instrumental variable method; 4) elaborate on the sensitivity analyses performed in the study; and 5) list the statistical packages used during the analysis.

#### *Details of propensity score matching algorithm*

We chose to use propensity score matching to estimate the average treatment effect on the treated rather than the average treatment effect (the expected effect if all patients in the population received a second arterial conduit) because clinical guidelines maintain that not every patient is a reasonable candidate for a second arterial conduit. We used non-parsimonious logistic regression to estimate each patient's predicted probability of receiving a second arterial conduit (Supplemental Figure 1);<sup>1</sup> the model included all variables presented in Table 1 of the primary manuscript. To accommodate the large sample size, patients were exact-matched with respect to number of diseased vessels, ejection fraction (at 5% intervals beginning at 30%), time interval from myocardial infarction to surgery, emergency status, severity of chronic lung disease, white race, and Hispanic race. Patients were then optimally matched with as many as four control patients matched to each treated patient to balance all baseline covariates.<sup>2</sup> To estimate the average treatment effect on the treated, each control within a matched set was down-weighted by the inverse of the total number of controls within the subclass (all treated patients received a weight of 1) (Supplemental Figure 2).<sup>3</sup>

We used a similar method of propensity score matching to compare recipients of a right internal thoracic artery graft with recipients of a radial artery graft. However, as these patients were already selected to receive a second arterial conduit, we estimated the average treatment effect to determine the impact of all patients receiving a right internal thoracic artery graft instead of a radial artery graft. Optimal matching on the propensity score with as many as 6 controls (radial artery recipients) matched to each treated (right internal thoracic artery recipients) permitted inclusion of almost the entire study population (24 of 5,866 patients excluded, 0.4% of sample). To estimate the average treatment effect, weights were assigned to each patient as discussed by Austin and Stuart.<sup>4</sup>

#### *Comparison of matched versus unmatched population*

A contrast of unmatched patients with matched patients for each comparison is included in Supplemental Table 3. In our propensity score-matched comparison of second arterial versus venous conduits, unmatched patients were older, more likely to be female, and had a greater burden of comorbidities. This is not unexpected; not all patients are reasonable candidates for a second arterial conduit and we specifically capped the number of allowable controls per subclass at 4 for that reason. However, with those restrictions we did match 17,930 patients who did not receive a second arterial conduit—but who had similar comorbidity profiles—to patients who did receive a second arterial conduit. Therefore, although our estimate of the effect of a second arterial conduit cannot be generalized to the entire population that undergoes coronary bypass surgery, there are many patients who do not receive second arterial conduits who have similar risk profiles to those who benefit from treatment. A contrast of unmatched patients with matched patients from our instrumental variable analysis demonstrated less imbalance than the aforementioned discussion of matched vs. unmatched patients in the propensity score-matched analysis. In fact, matched patients in the instrumental variable analysis were older than those in our propensity score-matched analysis and had more comorbidities. This difference in patient population may partially explain why our estimate of the effect of a second arterial conduit from our instrumental variable analysis slightly differed from that of our propensity score-matched analysis (additionally, our instrumental variable analysis estimates the complier average causal effect).

### *Using an instrumental variable approach to address confounding from unobserved covariates*

Observational studies represent an alternative to randomized trials to study the comparative effectiveness of different treatments. Unfortunately, a lack of randomization often introduces selection bias and confounding which may obscure the estimation of the true treatment effect. Analytical methods, such as regression, propensity scores, and matching, mitigate confounding owing to measured variables. The California CABG Outcomes Reporting Program (CCORP) is a clinical registry that includes a number of important variables that are not available in administrative discharge databases.<sup>5</sup> Almost all of the variables we use in our surgical practice to determine selection for a second arterial conduit are present in the CCORP. For this reason, propensity score matching was a reasonable strategy for minimizing confounding. However, this method ignores unmeasured confounders that are not present in the CCORP, such as target vessel size and stenosis, and the unmeasurable confounder of frailty. The instrumental variable method was designed to account for unmeasured confounders; conversationally one might say it seeks to find a pseudo-randomized experiment embedded within an observational study.

An instrumental variable method exploits a variable that influences which treatment subjects receive, and only affects outcome through its influence on treatment.<sup>6</sup> For this project, we used individual surgeon practice patterns as a preference-based instrumental variable. We believed a preference-based instrumental variable would be particularly well-suited for this observational study because: 1) the specific treatment a patient receives (second arterial conduit vs. venous conduit) is often determined by the preferences of the surgeon performing the procedure, and 2) for routine surgeries, patients are typically referred to surgeons in a manner that is not informed by severity or complexity of illness. In the case of coronary bypass surgery, a patient who received a second arterial conduit might have received a venous conduit had they been referred to a different surgeon. Surgeon utilization of second arterial conduits ranged from 0% to 100% of their cases (Supplemental Figure 3) and strongly affected the treatment each patient received (F-statistic = 25,282 from first stage least squares model; calculated in R with *ivmodel* package<sup>7</sup>).

An assumption made with instrumental variable methods is that the instrumental variable affects outcomes only through its effect on the treatment received (i.e. there is no direct effect of the instrumental variable on the outcome and there is no unmeasured confounding of the instrumental variable and outcome). This assumption is called the exclusion restriction assumption and cannot be formally tested. With respect to our study, one may argue that surgeons who frequently use arterial conduits improve survival because they are inherently more skilled, or because the care they provide is better than that of surgeons who infrequently or never use arterial conduits. Although this statement cannot be formally proven or disproven, we attempted to test the reasonableness of the assumption with available data. We compared surgeons in our study on outcomes of “out of sample” procedures and patients. That is, we examined 30,266 patients who underwent coronary bypass surgery with concomitant cardiac surgery procedures (e.g. valve, aortic, or mechanical circulatory support) during the study period and beyond (until December 31, 2013). Using multivariable Cox proportional hazards regression, and accounting for clustering of patients within surgeon and within hospital with random effects terms, we found that surgeons with higher rates of arterial conduit use did not significantly affect survival (HR 0.89, 95% CI 0.70 – 1.12, p=0.32). This observation at least partially supports our use of a surgeon-level characteristic as a preference-based instrumental variable because it is compatible with the required assumption that the instrumental variable does not predict different surgeon “skill-levels.” Further support for the instrumental variable not violating the exclusion restriction assumption is presented in the manuscript: in a mixed-effects Cox model of survival regressed on the treatment and a random effect for surgeon, the random effect for surgeon exhibited a near-negligible standard deviation. This suggests that in patients undergoing isolated, multi-vessel coronary bypass surgery, there is very little variability between surgeons with respect to their influence on the baseline hazard of death.

We used a matching-based instrumental variable method in our study.<sup>8</sup> Patients who presented to surgeons who use a second arterial conduit in more than 5% of their coronary bypass operations were considered encouraged, while those who presented to surgeons who use a second arterial conduit in less than 5% of coronary bypass operations were considered unencouraged. Given our large sample size, we were able to further strengthen our instrument without overly diminishing statistical power by excluding patients who presented to surgeons who use second arterial conduits in 5% to 20% of their coronary bypass operations. We then performed near-far matching, whereby patients were optimally pair matched to minimize differences in baseline covariates and maximize differences in the instrumental variable (Supplemental Table 5).<sup>8</sup> To estimate the effect of a second arterial conduit on survival and on freedom from major adverse cardiovascular and cerebrovascular events, we used the two-stage residual inclusion method.<sup>9</sup> Residuals were obtained from a least squares model regressing the treatment received on the dichotomous instrument (encouraged vs. unencouraged). The residuals from the first stage were then included as a covariate in a multivariable Cox proportional hazards model that also included the treatment received (second arterial conduit). The estimate for the coefficient of the treatment received represents the point estimate for the

complier average causal effect; 95% confidence intervals were obtained with 10,000 bootstrap replicates with resampling at the matched-pair level.

#### *Sensitivity analysis*

As previously mentioned, propensity score matching only helps mitigate confounding due to measured variables. Therefore, we conducted a sensitivity analysis to explore the extent to which the results from our propensity score matching design were robust to unmeasured bias. Through matching, we assume that patients who appear comparable are in fact comparable. However, if unmeasured confounding is present, patients who appear comparable are not always comparable. The gamma sensitivity parameter describes the fold increase in likelihood of receiving treatment between matched individuals.<sup>10,11</sup> In the main manuscript, we present the minimum value of gamma necessary to change our conclusion that the null hypothesis should be rejected. Further, the gamma parameter can be interpreted in terms of two parameters. Lambda controls the relationship between the unobserved bias and treatment assignment, while delta controls the relationship between the unobserved bias and the outcome.<sup>12</sup> We report the values of lambda and delta for the calculated gamma in Table 2 of the manuscript.

#### *Statistical software and packages used to perform the analysis*

Data was prepared for analysis in SAS (SAS Institute Inc., Cary, NC) and statistical analyses were performed in R version 3.2.3 (R Foundation, Vienna, Austria). The *survey* package<sup>13</sup> was used to compare baseline characteristics and operative mortality between groups. The Cochran Armitage test within the *coin* package<sup>14</sup> was used to evaluate trends over time. Survival analyses were performed with the *survival* package.<sup>15</sup> Restricted mean survival time differences were calculated and compared between groups with the *survRM2* package.<sup>16</sup> To evaluate the age-dependent effect of a second arterial conduit on all-cause mortality, a Cox proportional hazards model was fit to the study population with the interaction of a natural spline fit for age (3 knots) and receipt of a second arterial conduit with the *survival* package. Gamma parameters (and the corresponding lambda and delta) were calculated with the *coin* (to output log-rank transformations) and *sensitivitymv* package.<sup>17</sup>

**Supplemental Table 1. Definitions of Baseline Characteristics\***

| Baseline Comorbidity                                                                                                                                                                                                                                                                                                                                                                                                            | ICD9-CM Code                                                                                                                                                                                                                                                                                                                                                                                                                                                                                                                                                                                                                                                                                                                                                                                                                                                                                                                                                                                                                                                                                                                                                                   |
|---------------------------------------------------------------------------------------------------------------------------------------------------------------------------------------------------------------------------------------------------------------------------------------------------------------------------------------------------------------------------------------------------------------------------------|--------------------------------------------------------------------------------------------------------------------------------------------------------------------------------------------------------------------------------------------------------------------------------------------------------------------------------------------------------------------------------------------------------------------------------------------------------------------------------------------------------------------------------------------------------------------------------------------------------------------------------------------------------------------------------------------------------------------------------------------------------------------------------------------------------------------------------------------------------------------------------------------------------------------------------------------------------------------------------------------------------------------------------------------------------------------------------------------------------------------------------------------------------------------------------|
| Age, Year of Surgery, Sex, Race, Height, Weight, Ejection Fraction, Creatinine, Dialysis, Diabetes mellitus, Hypertension, Peripheral vascular disease, Cerebrovascular disease, Chronic lung disease, Congestive heart failure, Prior myocardial infarction, Prior PCI, Mitral regurgitation, Cardiogenic shock, Cardiopulmonary resuscitation, Immunosuppressed, Surgical status, Redo sternotomy, Number of diseased vessels | Obtained directly from California CABG Outcomes Reporting Program registry – definitions comply with the variable definitions of the Society of Thoracic Surgeons adult cardiac surgery database                                                                                                                                                                                                                                                                                                                                                                                                                                                                                                                                                                                                                                                                                                                                                                                                                                                                                                                                                                               |
| Atrial fibrillation/flutter                                                                                                                                                                                                                                                                                                                                                                                                     | <i>Diagnosis codes (from index and prior admissions)</i><br><br>42731, 42732                                                                                                                                                                                                                                                                                                                                                                                                                                                                                                                                                                                                                                                                                                                                                                                                                                                                                                                                                                                                                                                                                                   |
| Liver disease                                                                                                                                                                                                                                                                                                                                                                                                                   | <i>Diagnosis codes (from index and prior admissions)</i><br><br>700, 701, 7020, 7021, 7022, 7023, 7030, 7031, 7032, 7033, 7041, 7042, 7043, 7044, 7049, 7051, 7052, 7053, 7054, 7059, 706, 7070, 7071, 709, 4560, 4561, 4562, 45620, 45621, 4563, 4564, 4565, 4566, 4568, 570, 5710, 5711, 5712, 5713, 57140, 57141, 57142, 57149, 5715, 5716, 5718, 5719, 5720, 5721, 5722, 5723, 5724, 5728, 5730, 5731, 5732, 5733, 5734, 5735, 5738, 7824, 7891, 78959, 7904, 7948, and V427                                                                                                                                                                                                                                                                                                                                                                                                                                                                                                                                                                                                                                                                                               |
| Cancer                                                                                                                                                                                                                                                                                                                                                                                                                          | <p><u>Oropharyngeal cancers</u><br/><i>Diagnosis codes (from index and prior admissions)</i></p> <p>1400, 1401, 1403, 1404, 1405, 1406, 1408, 1409, 1410, 1411, 1412, 1413, 1414, 1415, 1416, 1418, 1419, 1420, 1421, 1422, 1428, 1429, 1430, 1431, 1438, 1439, 1440, 1441, 1448, 1449, 1450, 1451, 1452, 1453, 1454, 1455, 1456, 1458, 1459, 1460, 1461, 1462, 1463, 1464, 1465, 1466, 1467, 1468, 1469, 1470, 1471, 1472, 1473, 1478, 1479, 1480, 1481, 1482, 1483, 1488, 1489, 1490, 1491, 1498, and 1499</p> <p><u>Gastrointestinal cancers</u><br/><i>Diagnosis codes (from index and prior admissions)</i></p> <p>1500, 1501, 1502, 1503, 1504, 1505, 1506, 1508, 1509, 1510, 1511, 15012, 1513, 1514, 1515, 1516, 1518, 1519, 1520, 1521, 1522, 1523, 1528, 1529, 1530, 1531, 1532, 1533, 1534, 1535, 1536, 1537, 1538, 1539, 1540, 1541, 1542, 1543, 1548, 1550, 1551, 1552, 1560, 1561, 1562, 1568, 1569, 1570, 1571, 1572, 1573, 1574, 1578, 1579, 1580, 1588, 1589, 1590, 1591, 1598, and 1599</p> <p><u>Respiratory cancers</u><br/><i>Diagnosis codes (from index and prior admissions)</i></p> <p>1600, 1601, 1602, 1603, 1604, 1605, 1608, 1609, 161, 1610,</p> |

**Supplemental Table 1. Definitions of Baseline Characteristics (continued)\***

| Baseline Comorbidity | ICD9-CM Code                                                                                                                                                                                                                                                                                                                                                                                                                                                                                                                                                                                                                                                                                                                                                                                                                                                                                                                                                                                                                                                                                                                                                                                                                                                                                                                                                                                                                                                                                                                                                                                                                                                                                                                                                                                                                                                                                                                                                                                                                                                                                                                                                                                                                                                                                                                                                                                                                                                                                                                                                                                                                                                                                                                                                                                                                                      |
|----------------------|---------------------------------------------------------------------------------------------------------------------------------------------------------------------------------------------------------------------------------------------------------------------------------------------------------------------------------------------------------------------------------------------------------------------------------------------------------------------------------------------------------------------------------------------------------------------------------------------------------------------------------------------------------------------------------------------------------------------------------------------------------------------------------------------------------------------------------------------------------------------------------------------------------------------------------------------------------------------------------------------------------------------------------------------------------------------------------------------------------------------------------------------------------------------------------------------------------------------------------------------------------------------------------------------------------------------------------------------------------------------------------------------------------------------------------------------------------------------------------------------------------------------------------------------------------------------------------------------------------------------------------------------------------------------------------------------------------------------------------------------------------------------------------------------------------------------------------------------------------------------------------------------------------------------------------------------------------------------------------------------------------------------------------------------------------------------------------------------------------------------------------------------------------------------------------------------------------------------------------------------------------------------------------------------------------------------------------------------------------------------------------------------------------------------------------------------------------------------------------------------------------------------------------------------------------------------------------------------------------------------------------------------------------------------------------------------------------------------------------------------------------------------------------------------------------------------------------------------------|
| Cancer (continued)   | <p>1611, 1612, 1613, 1618, 1619, 162, 1620, 1622, 1623, 1624, 1625, 1628, 1629, 163, 1630, 1631, 1638, 1639, 164, 1640, 1461, 1462, 1463, 1468, 1649, 165, 1650, 1658, and 1659</p> <p><u>Bone and connective tissue cancer</u><br/><i>Diagnosis codes (from index and prior admissions)</i></p> <p>1700, 1701, 1702, 1703, 1704, 1705, 1706, 1707, 1708, 1709, 1710, 1712, 1713, 1714, 1715, 1716, 1717, 1718, 1719, 1720, 1721, 1722, 1723, 1724, 1725, 1726, 1727, 1728, 1729, 17300, 17301, 17302, 17309, 17310, 17311, 17312, 17319, 17320, 17321, 17322, 17329, 17330, 17331, 17332, 17339, 17340, 17341, 17342, 17349, 17350, 17351, 17352, 17359, 17360, 17361, 17362, 17369, 17370, 17371, 17372, 17379, 17380, 17381, 17382, 17389, 17390, 17391, 17392, 17399, 1740, 1741, 1742, 1743, 1744, 1745, 1746, 1748, 1749, 1750, 1759, 1760, 1761, 1762, 1763, 1764, 1765, 1768, and 1769</p> <p><u>Genitourinary cancers</u><br/><i>Diagnosis codes (from index and prior admissions)</i></p> <p>179, 1800, 1801, 1808, 1809, 181, 1820, 1821, 1828, 1830, 1832, 1833, 1834, 1835, 1838, 1839, 1840, 1841, 1842, 1843, 1844, 1848, 1849, 185, 1860, 1869, 1871, 1872, 1873, 1874, 1875, 1876, 1877, 1878, 1879, 1880, 1881, 1882, 1883, 1884, 1885, 1886, 1887, 1888, 1889, 1890, 1891, 1892, 1893, 1894, 1898, and 1899</p> <p><u>Lymphoid cancers</u><br/><i>Diagnosis codes (from index and prior admissions)</i></p> <p>20000, 20001, 20002, 20003, 20004, 20005, 20006, 20007, 20008, 2001, 20010, 20011, 20012, 20013, 20014, 20015, 20016, 20017, 20018, 2002, 20020, 20021, 20022, 20023, 20024, 20025, 20026, 20027, 20028, 20030, 20031, 20032, 20033, 20034, 20035, 20036, 20037, 20038, 20040, 20041, 20042, 20043, 20044, 20045, 20046, 20047, 20048, 20050, 20051, 20052, 20053, 20054, 20055, 20056, 20057, 20058, 20060, 20061, 20062, 20063, 20064, 20065, 20066, 20067, 20068, 20070, 20071, 20072, 20073, 20074, 20075, 20076, 20076, 20077, 20078, 20080, 20081, 20082, 20083, 20084, 20085, 20086, 20087, 20088, 20100, 20101, 20102, 20103, 20104, 20105, 20106, 20107, 20108, 20110, 20111, 20112, 20113, 20114, 20115, 20116, 20117, 20118, 20120, 20121, 20122, 20123, 20124, 20125, 20126, 20127, 20128, 20140, 20141, 20142, 20143, 20144, 20145, 20146, 20147, 20148, 20150, 20151, 20152, 20153, 20154, 20155, 20156, 20157, 20158, 20160, 20161, 20162, 20163, 20164, 20165, 20166, 20167, 20168, 20170, 20171, 20172, 20173, 20174, 20175, 20176, 20177, 20178, 20190, 20191, 20192, 20193, 20194, 20195, 20196, 20197, 20198, 20200, 20201, 20202, 20203, 20204, 20205, 20206, 20207, 20208, 20210, 20211, 20212, 20213, 20214, 20215, 20216, 20217, 20218, 20220, 20221, 20222, 20223, 20224, 20225, 20226, 20227, 20228, 20230, 20231, 20232, 20233, 20234, 20235, 20236, 20237, 20238, 20240, 20241,</p> |



**Supplemental Table 1. Definitions of Baseline Characteristics (continued)\***

| Baseline Comorbidity | ICD9-CM Code                                                                                                                                                                                                                                                                                                                                                                                                                                                                                                                                                                                                                                                                                                                                                                                                                                                                                                                                                                                                                                                                                                                                                                                                                                                                                                                                                                                                                                                                                                                                                                                                                                                                                                                                                                                                                                                                                                                                                                                                                                                                                  |
|----------------------|-----------------------------------------------------------------------------------------------------------------------------------------------------------------------------------------------------------------------------------------------------------------------------------------------------------------------------------------------------------------------------------------------------------------------------------------------------------------------------------------------------------------------------------------------------------------------------------------------------------------------------------------------------------------------------------------------------------------------------------------------------------------------------------------------------------------------------------------------------------------------------------------------------------------------------------------------------------------------------------------------------------------------------------------------------------------------------------------------------------------------------------------------------------------------------------------------------------------------------------------------------------------------------------------------------------------------------------------------------------------------------------------------------------------------------------------------------------------------------------------------------------------------------------------------------------------------------------------------------------------------------------------------------------------------------------------------------------------------------------------------------------------------------------------------------------------------------------------------------------------------------------------------------------------------------------------------------------------------------------------------------------------------------------------------------------------------------------------------|
| Cancer (continued)   | <p>20242, 20243, 20244, 20245, 20246, 20247, 20248, 20250, 20251, 20252, 20253, 20254, 20255, 20256, 20257, 20258, 20260, 20261, 20262, 20263, 20264, 20265, 20266, 20267, 20268, 20270, 20271, 20272, 20273, 20274, 20275, 20276, 20277, 20278, 20280, 20281, 20282, 20283, 20284, 20285, 20286, 20287, 20288, 20290, 20291, 20292, 20293, 20294, 20295, 20296, 20297, 20298, 20300, 20301, 20302, 20310, 20311, 20312, 2038, 20380, 20381, and 20382</p> <p><u>Hematologic cancers</u><br/><i>Diagnosis codes (from index and prior admissions)</i></p> <p>20400, 20401, 20402, 20410, 20411, 20412, 20420, 20421, 20422, 20480, 20481, 20482, 20490, 20491, 20492, 20500, 20501, 20502, 20510, 20511, 20512, 20520, 20521, 20522, 20530, 20531, 20532, 20580, 20581, 20582, 20590, 20591, 20592, 20600, 20601, 20602, 20610, 20611, 20612, 20620, 20621, 20622, 20680, 20681, 20682, 20690, 20691, 20692, 20700, 20701, 20702, 20710, 20711, 20712, 20720, 20721, 20722, 20780, 20781, 20782, 20800, 20801, 20802, 20810, 20811, 20812, 2082, 20820, 20821, 20822, 20880, 20881, 20882, 20890, 20891, 20892, 20900, 20901, 20902, 20903, 20910, 20911, 20912, 20913, 20914, 20915, 20916, 20917, 20920, 20921, 20922, 20923, 20924, 20925, 20926, 20927, 20929, 20930, 20931, 20932, 20933, 20934, 20935, 20936, 20940, 20941, 20942, 20943, 20950, 20951, 20952, 20953, 20954, 20955, 20956, 20957, 20960, 20961, 20962, 20963, 20964, 20965, 20966, 20967, 20969, 20970, 20971, 20972, 20973, 20974, 20975, and 20979</p> <p><u>Other cancers</u><br/><i>Diagnosis codes (from index and prior admissions)</i></p> <p>1900, 1901, 1902, 1903, 1904, 1905, 1906, 1907, 1908, 1909, 191, 1910, 1911, 1912, 1913, 1914, 1915, 1916, 1917, 1918, 1919, 1920, 1921, 1922, 1923, 1928, 1929, 193, 1940, 1941, 1943, 1944, 1945, 1946, 1948, 1950, 1951, 1952, 1953, 1954, 1955, 1958, 1960, 1961, 1962, 1963, 1965, 1966, 1968, 1969, 1970, 1971, 1972, 1973, 1974, 1975, 1976, 1977, 1978, 1980, 1981, 1982, 1983, 1984, 1985, 1986, 1987, 19881, 19882, 19889, 199, 1990, 1991, and 1992</p> |
| Osteoporosis         | <p><i>Diagnosis codes (from index or prior admissions)</i></p> <p>7330, 73300, 73301, 73302, 73303, 73309</p>                                                                                                                                                                                                                                                                                                                                                                                                                                                                                                                                                                                                                                                                                                                                                                                                                                                                                                                                                                                                                                                                                                                                                                                                                                                                                                                                                                                                                                                                                                                                                                                                                                                                                                                                                                                                                                                                                                                                                                                 |
| Hip fracture         | <p><u>Fractures of the femur</u><br/><i>Diagnosis codes (from index or prior admissions)</i></p> <p>82000, 82001, 82002, 82003, 82009, 82010, 82011, 82012, 82013, 82019, 82020, 82021, 82022, 82030, 82031, 82032, 8208, 8209</p>                                                                                                                                                                                                                                                                                                                                                                                                                                                                                                                                                                                                                                                                                                                                                                                                                                                                                                                                                                                                                                                                                                                                                                                                                                                                                                                                                                                                                                                                                                                                                                                                                                                                                                                                                                                                                                                            |

**Supplemental Table 1. Definitions of Baseline Characteristics (continued)\***

| <b>Baseline Comorbidity</b> | <b>ICD9-CM Code</b>                                                                                                                                                                                                                                      |
|-----------------------------|----------------------------------------------------------------------------------------------------------------------------------------------------------------------------------------------------------------------------------------------------------|
| Hip fracture (continued)    | Fractures of the pelvis<br><i>Diagnosis codes (from index or prior admissions)</i><br><br>8080, 8081, 8082, 8083, 80841, 80842, 80843, 80844, 80849, 80851, 80852, 80853, 80854, 80859, 8088, 8089                                                       |
| Malnutrition                | <i>Diagnosis codes (from index or prior admissions)</i><br><br>260, 261, 262, 2630, 2631, 2632, 2638, 2639, 2699                                                                                                                                         |
| Anemia                      | <i>Diagnosis codes (from index or prior admissions)</i><br><br>2800, 2801, 2808, 2809, 2810, 2811, 2812, 2813, 2814, 2818, 2819, 2822, 2823, 2828, 2829, 2830, 28310, 28319, 2839, 28409, 28489, 2849, 2850, 2851, 28521, 28522, 28529, 2853, 2858, 2859 |
| Hypothyroidism              | <i>Diagnosis codes (from index or prior admissions)</i><br><br>244, 2440, 2441, 2442, 2443, 2448, 2449                                                                                                                                                   |
| Asthma                      | <i>Diagnosis codes (from index or prior admissions)</i><br><br>493, 4930, 49300, 49301, 49302, 4931, 49310, 49311, 49312, 49320, 49321, 49322, 4938, 49381, 49382, 4939, 49390, 49391, 49392                                                             |
| Dementia                    | <i>Diagnosis codes (from index or prior admissions)</i><br><br>2900, 290101, 29011, 29012, 29013, 29020, 29021, 2903, 29040, 29041, 29042, 29043, 29410, 29411, 29420, 29421, 3310, 33119, 33182, 2912                                                   |

\*Modified from Chikwe et al. JAMA 2015.

**Supplemental Table 2. Definitions of Study Endpoints**

| Outcome                                                      | ICD-9 Codes                                                                                                                                                                                                                                                                                                                                                                                       |
|--------------------------------------------------------------|---------------------------------------------------------------------------------------------------------------------------------------------------------------------------------------------------------------------------------------------------------------------------------------------------------------------------------------------------------------------------------------------------|
| Stroke (Days since surgery)                                  | <p><u>Ischemic</u><br/><i>Diagnosis codes (at index or subsequent admissions)</i></p> <p>43301, 43311, 43321, 43331, 43381, 43391, 43401, 43411, and 43491</p> <p><u>Hemorrhagic</u><br/><i>Diagnosis codes (at index or subsequent admissions)</i></p> <p>430, 431, 4320, 4321, and 4329</p> <p><u>Iatrogenic</u><br/><i>Diagnosis code (at index or subsequent admissions)</i></p> <p>99702</p> |
| Myocardial infarction (Days since surgery)                   | <p><i>Diagnosis codes (at index (if not present on admission) or subsequent admissions)</i></p> <p>41001, 41011, 41021, 41031, 41041, 41051, 41061, 41071, 41081, 41091, 41000, 41010, 41020, 41030, 41040, 41050, 41060, 41070, 41080, 41090</p>                                                                                                                                                 |
| Repeat revascularization (Days since surgery)                | <p><u>Surgical revascularization</u><br/><i>Procedure codes (from subsequent admissions)</i></p> <p>3610, 3611, 3612, 3613, 3614, 3614, 3615, 3616, 3617, 3619</p> <p><u>Percutaneous coronary intervention</u><br/><i>Procedure codes (at subsequent admission)</i></p> <p>0066, 1755, 3601, 3602, 3603, 3604, 3605, 3606, 3607, 3608, 3609</p>                                                  |
| Sternal wound infection (Any event within 1 year of surgery) | <p><i>Diagnosis and procedure codes (at index or subsequent admissions)</i></p> <p>99859</p> <p>with: 73000, 73008, 73010, 73018, 73020, 73028, 73080, 73088, 73090, 73098</p> <p>or with: 99830, 99831, 99832</p> <p>or with: 8622</p> <p>or with: 5192</p>                                                                                                                                      |
| Mortality                                                    | From death-linked data                                                                                                                                                                                                                                                                                                                                                                            |

**Supplemental Table 3. Baseline Characteristics of Matched vs. Unmatched Patients for Each Comparison\***

| Characteristic                        | Second Arterial Conduit vs. Venous Conduit (Propensity Score) |                    |           | Second Arterial Conduit vs. Venous Conduit (Near-Far) |                    |          | Right Internal Thoracic Artery vs. Radial Artery (Propensity Score) |                   |       |
|---------------------------------------|---------------------------------------------------------------|--------------------|-----------|-------------------------------------------------------|--------------------|----------|---------------------------------------------------------------------|-------------------|-------|
|                                       | Unmatched (N=35,689)                                          | Matched (N=23,743) | SMD       | Unmatched (N=42,450)                                  | Matched (N=16,982) | SMD      | Unmatched (N=24)                                                    | Matched (N=5,842) | SMD   |
| Age – yr                              | 67.8 ± 10.4                                                   | 63.4 ± 10.1        | 0.42      | 66.0 ± 10.5                                           | 66.1 ± 10.5        | 0.005    | 61.9 ± 9.9                                                          | 62.0 ± 10.5       | 0.009 |
| Year of surgery – yr                  | 2008.2 ± 1.6                                                  | 2008.1 ± 1.6       | 0.07      | 2008.2 ± 1.6                                          | 2008.1 ± 1.6       | 0.03     | 2008.6 ± 1.7                                                        | 2008.1 ± 1.6      | 0.32  |
| Male sex - no. (%)                    | 25120 (70.4)                                                  | 19813 (83.4)       | 0.31      | 31736 (74.8)                                          | 13197 (77.7)       | 0.07     | 16 (66.7)                                                           | 4987 (85.4)       | 0.45  |
| Race - no. (%)                        |                                                               |                    | 0.33      |                                                       |                    | 0.37     |                                                                     |                   | 5.42  |
| Unknown                               | 622 (1.7)                                                     | 303 (1.3)          |           | 690 (1.6)                                             | 235 (1.4)          |          | 0 (0.0)                                                             | 66 (1.1)          |       |
| White                                 | 19775 (55.4)                                                  | 16743 (70.5)       |           | 24108 (56.8)                                          | 12410 (73.1)       |          | 1 (4.2)                                                             | 4189 (71.7)       |       |
| Black                                 | 1588 (4.4)                                                    | 683 (2.9)          |           | 1731 (4.1)                                            | 540 (3.2)          |          | 23 (95.8)                                                           | 123 (2.1)         |       |
| Hispanic                              | 7617 (21.3)                                                   | 2844 (12.0)        |           | 8699 (20.5)                                           | 1762 (10.4)        |          | 0 (0.0)                                                             | 665 (11.4)        |       |
| Asian                                 | 4389 (12.3)                                                   | 2252 (9.5)         |           | 5110 (12.0)                                           | 1531 (9.0)         |          | 0 (0.0)                                                             | 618 (10.6)        |       |
| Native American                       | 82 (0.2)                                                      | 44 (0.2)           |           | 87 (0.2)                                              | 39 (0.2)           |          | 0 (0.0)                                                             | 12 (0.2)          |       |
| Other                                 | 1616 (4.5)                                                    | 874 (3.7)          |           | 2025 (4.8)                                            | 465 (2.7)          |          | 0 (0.0)                                                             | 169 (2.9)         |       |
| Height – cm                           | 169.0 ± 10.7                                                  | 172.8 ± 9.7        | 0.37      | 170.0 ± 10.5                                          | 171.8 ± 10.2       | 0.17     | 170.7 ± 13.2                                                        | 173.3 ± 9.5       | 0.23  |
| Weight – kg                           | 82.1 ± 18.7                                                   | 87.5 ± 18.7        | 0.29      | 83.7 ± 18.9                                           | 85.5 ± 18.7        | 0.10     | 104.6 ± 26.5                                                        | 88.2 ± 18.6       | 0.72  |
| Ejection fraction - %                 | 51.1 ± 14.0                                                   | 55.2 ± 12.2        | 0.31      | 51.9 ± 13.5                                           | 54.8 ± 13.0        | 0.21     | 54.0 ± 14.7                                                         | 55.6 ± 12.1       | 0.12  |
| Creatinine - mg/dL                    | 1.37 ± 1.31                                                   | 1.09 ± 0.58        | 0.27      | 1.27 ± 1.11                                           | 1.23 ± 1.02        | 0.03     | 1.03 ± 0.22                                                         | 1.08 ± 0.54       | 0.11  |
| Dialysis - no. (%)                    | 2021 (5.7)                                                    | 223 (0.9)          | 0.27      | 1640 (3.9)                                            | 604 (3.6)          | 0.02     | 0 (0.0)                                                             | 48 (0.8)          | 0.13  |
| Diabetes mellitus - no. (%)           | 17688 (49.6)                                                  | 8870 (37.4)        | 0.25      | 19644 (46.3)                                          | 6914 (40.7)        | 0.11     | 17 (70.8)                                                           | 2060 (35.3)       | 0.76  |
| Hypertension - no. (%)                | 31469 (88.2)                                                  | 19689 (82.9)       | 0.15      | 5604 (13.2)                                           | 2669 (15.7)        | 0.07     | 21 (87.5)                                                           | 4723 (80.8)       | 0.18  |
| Peripheral vascular disease - no. (%) | 5465 (15.3)                                                   | 2477 (10.4)        | 0.15      | 5946 (14.0)                                           | 1996 (11.8)        | 0.07     | 1 (4.2)                                                             | 557 (9.5)         | 0.21  |
| Cerebrovascular disease - no. (%)     | 5572 (15.6)                                                   | 2407 (10.1)        | 0.16      | 5896 (13.9)                                           | 2083 (12.3)        | 0.05     | 4 (16.7)                                                            | 527 (9.0)         | 0.23  |
| Chronic lung disease - no. (%)        |                                                               |                    | 0.27      |                                                       |                    | 0.20     |                                                                     |                   | 0.30  |
| None                                  | 26993 (75.6)                                                  | 20101 (84.7)       |           | 32816 (77.3)                                          | 14278 (84.1)       |          | 21 (87.5)                                                           | 4962 (84.9)       |       |
| Mild                                  | 4506 (12.6)                                                   | 2432 (10.2)        |           | 5172 (12.2)                                           | 1766 (10.4)        |          | 2 (8.3)                                                             | 590 (10.1)        |       |
| Moderate                              | 2349 (6.6)                                                    | 772 (3.3)          |           | 2553 (6.0)                                            | 568 (3.3)          |          | 0 (0.0)                                                             | 185 (3.2)         |       |
| Severe                                | 1813 (5.1)                                                    | 438 (1.8)          |           | 1881 (4.4)                                            | 370 (2.2)          |          | 1 (4.2)                                                             | 103 (1.8)         |       |
| Congestive heart failure - no. (%)    | 27790 (77.9)                                                  | 21065 (88.7)       | 0.29      | 8190 (19.3)                                           | 2382 (14.0)        | 0.14     | 5 (20.8)                                                            | 578 (9.9)         | 0.31  |
| Prior myocardial infarction - no. (%) |                                                               |                    | 0.28      |                                                       |                    | 0.15     |                                                                     |                   | 0.54  |
| None                                  | 17130 (48.0)                                                  | 13426 (56.5)       |           | 21402 (50.4)                                          | 9154 (53.9)        |          | 11 (45.8)                                                           | 3321 (56.8)       |       |
| >21 days                              | 6065 (17.0)                                                   | 4195 (17.7)        |           | 7262 (17.1)                                           | 2998 (17.7)        |          | 8 (33.3)                                                            | 1002 (17.2)       |       |
| 8 to 21 days                          | 2063 (5.8)                                                    | 610 (2.6)          |           | 2141 (5.0)                                            | 532 (3.1)          |          | 0 (0.0)                                                             | 143 (2.4)         |       |
| 1 to 7 days                           | 8577 (24.0)                                                   | 5118 (21.6)        |           | 9843 (23.2)                                           | 3852 (22.7)        |          | 4 (16.7)                                                            | 1253 (21.4)       |       |
| >6 hrs but <24 hrs                    | 1202 (3.4)                                                    | 265 (1.1)          |           | 1181 (2.8)                                            | 286 (1.7)          |          | 1 (4.2)                                                             | 69 (1.1)          |       |
| ≤6 hrs                                | 583 (1.6)                                                     | 107 (0.5)          | 530 (1.2) | 160 (0.9)                                             | 0 (0.0)            | 36 (0.6) |                                                                     |                   |       |

**Supplemental Table 3. Baseline Characteristics of Matched vs. Unmatched Patients for Each Comparison (continued)\***

| Characteristic                          | Second Arterial Conduit vs. Venous Conduit (Propensity Score) |                    |      | Second Arterial Conduit vs. Venous Conduit (Near-Far) |                    |        | Right Internal Thoracic Artery vs. Radial Artery (Propensity Score) |                   |      |
|-----------------------------------------|---------------------------------------------------------------|--------------------|------|-------------------------------------------------------|--------------------|--------|---------------------------------------------------------------------|-------------------|------|
|                                         | Unmatched (N=35,689)                                          | Matched (N=23,743) | SMD  | Unmatched (N=42,450)                                  | Matched (N=16,982) | SMD    | Unmatched (N=24)                                                    | Matched (N=5,842) | SMD  |
| Prior PCI - no. (%)                     |                                                               |                    |      |                                                       |                    |        |                                                                     |                   |      |
| None                                    | 27770 (77.8)                                                  | 18922 (79.7)       | 0.09 | 33350 (78.6)                                          | 13342 (78.6)       | 0.01   | 19 (79.2)                                                           | 4672 (80.0)       | 0.09 |
| >6 hrs                                  | 7575 (21.2)                                                   | 4733 (19.9)        |      | 8797 (20.7)                                           | 3511 (20.7)        |        | 5 (20.8)                                                            | 1149 (19.7)       |      |
| ≤6 hrs                                  | 346 (1.0)                                                     | 83 (0.3)           |      | 300 (0.7)                                             | 129 (0.8)          |        | 0 (0.0)                                                             | 21 (0.4)          |      |
| Mitral regurgitation - no. (%)          |                                                               |                    |      |                                                       |                    |        |                                                                     |                   |      |
| None                                    | 23178 (64.9)                                                  | 16176 (68.1)       | 0.17 | 28802 (67.8)                                          | 10552 (62.1)       | 0.18   | 9 (37.5)                                                            | 3978 (68.1)       | 0.68 |
| Trivial                                 | 3731 (10.5)                                                   | 3103 (13.1)        |      | 4240 (10.0)                                           | 2594 (15.3)        |        | 6 (25.0)                                                            | 822 (14.1)        |      |
| Mild                                    | 5234 (14.7)                                                   | 2808 (11.8)        |      | 5588 (13.2)                                           | 2454 (14.5)        |        | 7 (29.2)                                                            | 653 (11.2)        |      |
| Moderate                                | 1866 (5.2)                                                    | 707 (3.0)          |      | 1776 (4.2)                                            | 797 (4.7)          |        | 1 (4.2)                                                             | 158 (2.7)         |      |
| Severe                                  | 204 (0.6)                                                     | 42 (0.2)           |      | 182 (0.4)                                             | 64 (0.4)           |        | 0 (0.0)                                                             | 11 (0.2)          |      |
| Cardiogenic shock - no. (%)             | 545 (1.5)                                                     | 89 (0.4)           | 0.12 | 481 (1.1)                                             | 153 (0.9)          | 0.03   | 1 (4.2)                                                             | 17 (0.3)          | 0.27 |
| Cardiopulmonary resuscitation - no. (%) | 198 (0.6)                                                     | 61 (0.3)           | 0.05 | 199 (0.5)                                             | 60 (0.4)           | 0.02   | 0 (0.0)                                                             | 12 (0.2)          | 0.06 |
| Atrial fibrillation - no. (%)           | 10471 (29.3)                                                  | 6332 (26.7)        | 0.06 | 11619 (27.4)                                          | 5184 (30.5)        | 0.07   | 7 (29.2)                                                            | 1518 (26.0)       | 0.07 |
| Liver disease - no. (%)                 | 2075 (5.8)                                                    | 859 (3.6)          | 0.10 | 2320 (5.5)                                            | 614 (3.6)          | 0.09   | 2 (8.3)                                                             | 195 (3.3)         | 0.21 |
| Cancer - no. (%)                        | 1479 (4.1)                                                    | 637 (2.7)          | 0.08 | 1511 (3.6)                                            | 605 (3.6)          | <0.001 | 2 (8.3)                                                             | 143 (2.4)         | 0.26 |
| Osteoporosis - no. (%)                  | 1127 (3.2)                                                    | 365 (1.5)          | 0.11 | 1166 (2.7)                                            | 326 (1.9)          | 0.06   | 1 (4.2)                                                             | 75 (1.3)          | 0.18 |
| Hip fracture - no. (%)                  | 180 (0.5)                                                     | 49 (0.2)           | 0.05 | 191 (0.4)                                             | 38 (0.2)           | 0.04   | 0 (0.0)                                                             | 10 (0.2)          | 0.06 |
| Malnutrition - no. (%)                  | 1439 (4.0)                                                    | 413 (1.7)          | 0.14 | 1563 (3.7)                                            | 289 (1.7)          | 0.12   | 0 (0.0)                                                             | 90 (1.5)          | 0.18 |
| Anemia - no. (%)                        | 16912 (47.4)                                                  | 10996 (46.3)       | 0.02 | 19395 (45.7)                                          | 8513 (50.1)        | 0.09   | 14 (58.3)                                                           | 2798 (47.9)       | 0.21 |
| Hypothyroidism - no. (%)                | 3686 (10.3)                                                   | 1888 (8.0)         | 0.08 | 3994 (9.4)                                            | 1580 (9.3)         | 0.004  | 2 (8.3)                                                             | 430 (7.4)         | 0.04 |
| Asthma - no. (%)                        | 2698 (7.6)                                                    | 1381 (5.8)         | 0.07 | 2967 (7.0)                                            | 1112 (6.5)         | 0.02   | 2 (8.3)                                                             | 355 (6.1)         | 0.09 |
| Dementia - no. (%)                      | 276 (0.8)                                                     | 64 (0.3)           | 0.07 | 278 (0.7)                                             | 62 (0.4)           | 0.04   | 0 (0.0)                                                             | 12 (0.2)          | 0.06 |
| Immunosuppressed - no. (%)              | 927 (2.6)                                                     | 391 (1.6)          | 0.07 | 919 (2.2)                                             | 399 (2.3)          | 0.01   | 1 (4.2)                                                             | 89 (1.5)          | 0.16 |
| Surgical status - no. (%)               |                                                               |                    |      |                                                       |                    |        |                                                                     |                   |      |
| Elective                                | 11600 (32.5)                                                  | 10041 (42.3)       | 0.25 | 14403 (33.9)                                          | 7238 (42.6)        | 0.18   | 20 (83.3)                                                           | 2519 (43.1)       | 1.63 |
| Urgent                                  | 22286 (62.4)                                                  | 13277 (55.9)       |      | 26335 (62.0)                                          | 9228 (54.3)        |        | 0 (0.0)                                                             | 3213 (55.0)       |      |
| Emergent                                | 1781 (5.0)                                                    | 428 (1.8)          |      | 1693 (4.0)                                            | 516 (3.0)          |        | 3 (12.5)                                                            | 110 (1.9)         |      |
| Emergent salvage                        | 17 (0.0)                                                      | 0 (0.0)            |      | 17 (0.0)                                              | 0 (0.0)            |        | 1 (4.2)                                                             | 0 (0.0)           |      |
| Redo sternotomy - no. (%)               | 47 (0.1)                                                      | 42 (0.2)           | 0.01 | 61 (0.1)                                              | 28 (0.2)           | 0.01   | 0 (0.0)                                                             | 11 (0.2)          | 0.06 |
| ≥3 vessel disease - no. (%)             | 28714 (80.5)                                                  | 19624 (82.7)       | 0.06 | 34486 (81.2)                                          | 13852 (81.6)       | 0.008  | 18 (75.0)                                                           | 4826 (82.6)       | 0.19 |
| Surgeon volume - isolated CABG cases    | 337 ± 181                                                     | 326 ± 173          | 0.06 | 336 ± 181                                             | 323 ± 169          | 0.08   | 344 ± 199                                                           | 321 ± 164         | 0.13 |

\*Plus-minus values are means +/- standard deviation. 4% of patients missing data for mitral regurgitation, otherwise no variable with >0.2% missingness. CABG, coronary artery bypass grafting; ITA, internal thoracic artery; PCI, percutaneous coronary intervention; SMD, standardized mean difference

**Supplemental Table 4. Baseline Characteristics of the Study Population after Propensity Score Matching Stratified by Number of Diseased Vessels\***

| Characteristic                     | Two-Vessel Disease <sup>†</sup> |                         |        | At-Least Three Vessel Disease <sup>†</sup> |                         |        |
|------------------------------------|---------------------------------|-------------------------|--------|--------------------------------------------|-------------------------|--------|
|                                    | Venous Second Conduit           | Arterial Second Conduit |        | Venous Second Conduit                      | Arterial Second Conduit |        |
|                                    | (N=1,003)                       | (N=1,003)               | SMD    | (N=4,810)                                  | (N=4,810)               | SMD    |
| Age - yr                           | 62.4 ± 10.6                     | 61.6 ± 10.7             | 0.08   | 62.5 ± 10.4                                | 62.1 ± 10.4             | 0.04   |
| Year of surgery - yr               | 2008.1 ± 1.6                    | 2008.1 ± 1.6            | 0.007  | 2008.1 ± 1.6                               | 2008.1 ± 1.6            | 0.01   |
| Male sex - no. (%)                 | 798.5 (79.6)                    | 821.0 (81.9)            | 0.06   | 4098.6 (85.2)                              | 4139.0 (86.0)           | 0.02   |
| Race - no. (%)                     |                                 |                         |        |                                            |                         |        |
| Unknown                            | 13.3 (1.3)                      | 13.0 (1.3)              | 0.11   | 62.8 (1.3)                                 | 53.0 (1.1)              | 0.08   |
| White                              | 727.0 (72.5)                    | 727.0 (72.5)            |        | 3434.0 (71.4)                              | 3434.0 (71.4)           |        |
| Black                              | 31.3 (3.1)                      | 27.0 (2.7)              |        | 139.2 (2.9)                                | 115.0 (2.4)             |        |
| Hispanic                           | 105.0 (10.5)                    | 105.0 (10.5)            |        | 550.0 (11.4)                               | 550.0 (11.4)            |        |
| Asian                              | 86.8 (8.6)                      | 106.0 (10.6)            |        | 426.2 (8.9)                                | 505.0 (10.5)            |        |
| Native American                    | 1.6 (0.2)                       | 2.0 (0.2)               |        | 9.6 (0.2)                                  | 9.0 (0.2)               |        |
| Other                              | 38.0 (3.8)                      | 23.0 (2.3)              |        | 188.2 (3.9)                                | 144.0 (3.0)             |        |
| Height - cm                        | 172.6 ± 10.1                    | 173.0 ± 9.7             | 0.04   | 173.3 ± 9.6                                | 173.4 ± 9.5             | 0.02   |
| Weight - kg                        | 87.6 ± 19.0                     | 88.2 ± 19.7             | 0.03   | 88.1 ± 18.8                                | 88.4 ± 18.4             | 0.01   |
| Ejection fraction - %              | 57.7 ± 11.2                     | 57.7 ± 11.2             | 0.001  | 55.2 ± 12.1                                | 55.2 ± 12.1             | <0.001 |
| Creatinine - mg/dL                 | 1.08 ± 0.65                     | 1.05 ± 0.49             | 0.06   | 1.09 ± 0.55                                | 1.08 ± 0.55             | 0.01   |
| Dialysis - no. (%)                 | 7.4 (0.7)                       | 4.0 (0.4)               | 0.05   | 48.8 (1.0)                                 | 43.0 (0.9)              | 0.01   |
| Diabetes mellitus - no. (%)        | 321.2 (32.0)                    | 306.0 (30.5)            | 0.03   | 1744.6 (36.3)                              | 1745.0 (36.3)           | <0.001 |
| Hypertension - no. (%)             | 797.6 (79.5)                    | 779.0 (77.7)            | 0.05   | 3950.8 (82.1)                              | 3923.0 (81.6)           | 0.02   |
| PVD - no. (%)                      | 91.7 (9.1)                      | 80.0 (8.0)              | 0.04   | 481.5 (10.0)                               | 474.0 (9.9)             | 0.005  |
| Cerebrovascular disease - no. (%)  | 93.4 (9.3)                      | 84.0 (8.4)              | 0.03   | 465.2 (9.7)                                | 443.0 (9.2)             | 0.02   |
| Chronic lung disease - no. (%)     |                                 |                         |        |                                            |                         |        |
| None                               | 876.0 (87.3)                    | 876.0 (87.3)            | <0.001 | 4081.0 (84.8)                              | 4081.0 (84.8)           | <0.001 |
| Mild                               | 78.0 (7.8)                      | 78.0 (7.8)              |        | 501.0 (10.4)                               | 501.0 (10.4)            |        |
| Moderate                           | 34.0 (3.4)                      | 34.0 (3.4)              |        | 144.0 (3.0)                                | 144.0 (3.0)             |        |
| Severe                             | 15.0 (1.5)                      | 15.0 (1.5)              |        | 84.0 (1.7)                                 | 84.0 (1.7)              |        |
| Congestive heart failure - no. (%) | 85.2 (8.5)                      | 86.0 (8.6)              | 0.003  | 524.9 (10.9)                               | 489.0 (10.2)            | 0.02   |
| Prior MI - no. (%)                 |                                 |                         |        |                                            |                         |        |
| None                               | 658 (65.6)                      | 658 (65.6)              | <0.001 | 2668.0 (55.5)                              | 2668.0 (55.5)           | <0.001 |
| >21 days                           | 153.0 (15.3)                    | 153.0 (15.3)            |        | 848.0 (17.6)                               | 848.0 (17.6)            |        |
| 8 to 21 days                       | 23.0 (2.3)                      | 23.0 (2.3)              |        | 117.0 (2.4)                                | 117.0 (2.4)             |        |
| 1 to 7 days                        | 161.0 (16.1)                    | 161.0 (16.1)            |        | 1089.0 (22.6)                              | 1089.0 (22.6)           |        |
| >6 hrs but <24 hrs                 | 6.0 (0.6)                       | 6.0 (0.6)               |        | 58.0 (1.2)                                 | 58.0 (1.2)              |        |
| ≤6 hrs                             | 2.0 (0.2)                       | 2.0 (0.2)               |        | 22.0 (0.5)                                 | 22.0 (0.5)              |        |
| Prior PCI - no. (%)                |                                 |                         |        |                                            |                         |        |
| None                               | 771.8 (77.0)                    | 769.0 (76.7)            | 0.01   | 3891.8 (80.9)                              | 3884.0 (80.7)           | 0.01   |
| >6 hrs                             | 227.6 (22.7)                    | 231.0 (23.0)            |        | 902.2 (18.8)                               | 913.0 (19.0)            |        |
| ≤6 hrs                             | 3.6 (0.4)                       | 3.0 (0.3)               |        | 15.9 (0.3)                                 | 13.0 (0.3)              |        |
| Mitral regurgitation - no. (%)     |                                 |                         |        |                                            |                         |        |
| None                               | 733.7 (73.1)                    | 729.0 (72.7)            | 0.04   | 3206.6 (66.7)                              | 3223.0 (67.0)           | 0.02   |
| Trivial                            | 121.2 (12.1)                    | 133.0 (13.3)            |        | 678.5 (14.1)                               | 687.0 (14.3)            |        |
| Mild                               | 91.9 (9.2)                      | 89.0 (8.9)              |        | 589.2 (12.3)                               | 565.0 (11.7)            |        |
| Moderate                           | 18.4 (1.8)                      | 17.0 (1.7)              |        | 151.2 (3.1)                                | 140.0 (2.9)             |        |
| Severe                             | 1.2 (0.1)                       | 1.0 (0.1)               |        | 8.6 (0.2)                                  | 10.0 (0.2)              |        |
| Cardiogenic shock - no. (%)        | 3.5 (0.3)                       | 2.0 (0.2)               | 0.03   | 18.8 (0.4)                                 | 13.0 (0.3)              | 0.02   |
| CPR - no. (%)                      | 2.8 (0.3)                       | 2.0 (0.2)               | 0.02   | 10.2 (0.2)                                 | 8.0 (0.2)               | 0.01   |

**Supplemental Table 4. Baseline Characteristics of the Study Population after Propensity Score Matching Stratified by Number of Diseased Vessels (continued)\***

| Characteristic                 | Two-Vessel Disease <sup>†</sup> |                         |        | At-Least Three Vessel Disease <sup>†</sup> |                         |        |
|--------------------------------|---------------------------------|-------------------------|--------|--------------------------------------------|-------------------------|--------|
|                                | Venous Second Conduit           | Arterial Second Conduit | SMD    | Venous Second Conduit                      | Arterial Second Conduit | SMD    |
|                                | (N=1,003)                       | (N=1,003)               |        | (N=4,810)                                  | (N=4,810)               |        |
| Atrial fibrillation - no. (%)  | 256.4 (25.6)                    | 252.0 (25.1)            | 0.01   | 1277.0 (26.5)                              | 1261.0 (26.2)           | 0.008  |
| Liver disease - no. (%)        | 34.1 (3.4)                      | 30.0 (3.0)              | 0.02   | 164.8 (3.4)                                | 165.0 (3.4)             | <0.001 |
| Cancer - no. (%)               | 35.6 (3.5)                      | 32.0 (3.2)              | 0.02   | 112.6 (2.3)                                | 112.0 (2.3)             | 0.001  |
| Osteoporosis - no. (%)         | 18.0 (1.8)                      | 14.0 (1.4)              | 0.03   | 68.3 (1.4)                                 | 62.0 (1.3)              | 0.01   |
| Hip fracture - no. (%)         | 0.5 (0.0)                       | 0.0 (0.0)               | 0.03   | 12.3 (0.3)                                 | 10.0 (0.2)              | 0.01   |
| Malnutrition - no. (%)         | 15.2 (1.5)                      | 11.0 (1.1)              | 0.04   | 85.1 (1.8)                                 | 79.0 (1.6)              | 0.01   |
| Anemia - no. (%)               | 470.0 (46.9)                    | 479.0 (47.8)            | 0.02   | 2292.0 (47.7)                              | 2308.0 (48.0)           | 0.007  |
| Hypothyroidism - no. (%)       | 81.3 (8.1)                      | 76.0 (7.6)              | 0.02   | 368.6 (7.7)                                | 355.0 (7.4)             | 0.01   |
| Asthma - no. (%)               | 65.2 (6.5)                      | 69.0 (6.9)              | 0.02   | 274.2 (5.7)                                | 280.0 (5.8)             | 0.005  |
| Dementia - no. (%)             | 5.4 (0.5)                       | 3.0 (0.3)               | 0.04   | 12.0 (0.2)                                 | 9.0 (0.2)               | 0.01   |
| Immunosuppressed - no. (%)     | 21.2 (2.1)                      | 22.0 (2.2)              | 0.005  | 74.2 (1.5)                                 | 67.0 (1.4)              | 0.01   |
| Surgical status - no. (%)      |                                 |                         |        |                                            |                         |        |
| Elective                       | 465.0 (46.4)                    | 465.0 (46.4)            | <0.001 | 2056.0 (42.7)                              | 2056.0 (42.7)           | <0.001 |
| Urgent                         | 523.0 (52.1)                    | 523.0 (52.1)            |        | 2670.0 (55.5)                              | 2670.0 (55.5)           |        |
| Emergent                       | 15.0 (1.5)                      | 15.0 (1.5)              |        | 84.0 (1.7)                                 | 84.0 (1.7)              |        |
| Emergent salvage               | 0 (0)                           | 0 (0)                   |        | 0 (0)                                      | 0 (0)                   |        |
| Redo sternotomy - no. (%)      | 3.1 (0.3)                       | 3.0 (0.3)               | 0.002  | 8.3 (0.2)                                  | 8.0 (0.2)               | 0.002  |
| ≥3 vessel disease - no. (%)    | 0 (0)                           | 0 (0)                   | -      | 4810.0 (100.0)                             | 4810.0 (100.0)          | -      |
| Surgeon volume - isolated CABG | 339 ± 175                       | 308 ± 167               | 0.18   | 322 ± 174                                  | 325 ± 163               | 0.01   |

\*Plus-minus values are means +/- standard deviation. 4% of patients missing data for mitral regurgitation, otherwise no variable with >0.2% missingness. If any missing data present, groups were balanced on missingness for each variable. CABG, coronary artery bypass grafting; CPR, cardiopulmonary resuscitation; MI, myocardial infarction; PCI, percutaneous coronary intervention; PVD, peripheral vascular disease; SMD, standardized mean difference

<sup>†</sup>The number of patients and proportions presented are weighted due to variable 1:k matching and for estimation of the average treatment effect on the treated. Total number matched: 2-vessel arterial conduit = 1,003, 2-vessel venous conduit = 3,116; 3-vessel arterial conduit = 4,810, 3-vessel venous conduit = 14,814

**Supplemental Table 5. Baseline Characteristics of the Study Population Before and After Near-Far Matching\***

| Characteristic                     | Before Matching            |                         |          | After Matching            |                         |        |
|------------------------------------|----------------------------|-------------------------|----------|---------------------------|-------------------------|--------|
|                                    | Unencouraged<br>(N=50,708) | Encouraged<br>(N=8,724) | SMD      | Unencouraged<br>(N=8,491) | Encouraged<br>(N=8,491) | SMD    |
| Age - yr                           | 66.0 ± 10.5                | 66.2 ± 10.7             | 0.02     | 66.0 ± 10.3               | 66.2 ± 10.7             | 0.02   |
| Year of surgery - yr               | 2008.2 ± 1.6               | 2008.1 ± 1.6            | 0.01     | 2008.1 ± 1.6              | 2008.1 ± 1.6            | 0.02   |
| Male sex - no. (%)                 | 38190 (75.3)               | 6743 (77.3)             | 0.05     | 6615 (77.9)               | 6582 (77.5)             | 0.009  |
| Race - no. (%)                     |                            |                         | 0.32     |                           |                         | 0.08   |
| Unknown                            | 819 (1.6)                  | 106 (1.2)               |          | 130 (1.5)                 | 105 (1.2)               |        |
| White                              | 30144 (59.4)               | 6374 (73.1)             |          | 6205 (73.1)               | 6205 (73.1)             |        |
| Black                              | 1994 (3.9)                 | 277 (3.2)               |          | 270 (3.2)                 | 270 (3.2)               |        |
| Hispanic                           | 9544 (18.8)                | 917 (10.5)              |          | 881 (10.4)                | 881 (10.4)              |        |
| Asian                              | 5804 (11.4)                | 837 (9.6)               |          | 710 (8.4)                 | 821 (9.7)               |        |
| Native American                    | 103 (0.2)                  | 23 (0.3)                |          | 17 (0.2)                  | 22 (0.3)                |        |
| Other                              | 2300 (4.5)                 | 190 (2.2)               |          | 278 (3.3)                 | 187 (2.2)               |        |
| Height - cm                        | 170.3 ± 10.5               | 171.8 ± 10.1            | 0.14     | 171.8 ± 10.2              | 171.8 ± 10.1            | 0.004  |
| Weight - kg                        | 84.0 ± 18.9                | 85.4 ± 18.7             | 0.07     | 85.6 ± 18.8               | 85.4 ± 18.7             | 0.01   |
| Ejection fraction - %              | 52.4 ± 13.5                | 54.8 ± 13.2             | 0.18     | 54.7 ± 13.0               | 54.8 ± 13.1             | 0.005  |
| Creatinine - mg/dL                 | 1.26 ± 1.10                | 1.23 ± 1.00             | 0.03     | 1.24 ± 1.04               | 1.23 ± 1.00             | 0.008  |
| Dialysis - no. (%)                 | 1941 (3.8)                 | 303 (3.5)               | 0.02     | 309 (3.6)                 | 295 (3.5)               | 0.009  |
| Diabetes mellitus - no. (%)        | 22996 (45.3)               | 3562 (40.8)             | 0.09     | 3460 (40.7)               | 3454 (40.7)             | 0.001  |
| Hypertension - no. (%)             | 43811 (86.4)               | 7347 (84.2)             | 0.06     | 7169 (84.4)               | 7144 (84.1)             | 0.008  |
| PVD - no. (%)                      | 6879 (13.6)                | 1063 (12.2)             | 0.04     | 966 (11.4)                | 1030 (12.1)             | 0.02   |
| Cerebrovascular disease - no. (%)  | 6904 (13.6)                | 1075 (12.3)             | 0.04     | 1036 (12.2)               | 1047 (12.3)             | 0.004  |
| Chronic lung disease - no. (%)     |                            |                         | 0.14     |                           |                         | <0.001 |
| None                               | 39850 (78.6)               | 7244 (83.0)             |          | 7139 (84.1)               | 7139 (84.1)             |        |
| Mild                               | 5983 (11.8)                | 955 (10.9)              |          | 883 (10.4)                | 883 (10.4)              |        |
| Moderate                           | 2806 (5.5)                 | 315 (3.6)               |          | 284 (3.3)                 | 284 (3.3)               |        |
| Severe                             | 2041 (4.0)                 | 210 (2.4)               |          | 185 (2.2)                 | 185 (2.2)               |        |
| Congestive heart failure - no. (%) | 9323 (18.4)                | 1249 (14.3)             | 0.11     | 1183 (13.9)               | 1199 (14.1)             | 0.02   |
| Prior MI - no. (%)                 |                            |                         | 0.10     |                           |                         | <0.001 |
| None                               | 25957 (51.2)               | 4599 (52.7)             |          | 4577 (53.9)               | 4577 (53.9)             |        |
| >21 days                           | 8706 (17.2)                | 1554 (17.8)             |          | 1499 (17.7)               | 1499 (17.7)             |        |
| 8 to 21 days                       | 2376 (4.7)                 | 297 (3.4)               |          | 266 (3.1)                 | 266 (3.1)               |        |
| 1 to 7 days                        | 11723 (23.1)               | 1972 (22.6)             |          | 1926 (22.7)               | 1926 (22.7)             |        |
| >6 hrs but <24 hrs                 | 1292 (2.6)                 | 175 (2.0)               |          | 143 (1.7)                 | 143 (1.7)               |        |
| ≤6 hrs                             | 564 (1.1)                  | 126 (1.4)               | 80 (0.9) | 80 (0.9)                  |                         |        |
| Prior PCI - no. (%)                |                            |                         | 0.03     |                           |                         | 0.03   |
| None                               | 39817 (78.5)               | 6875 (78.8)             |          | 6621 (78.0)               | 6721 (79.2)             |        |
| >6 hrs                             | 10538 (20.8)               | 1770 (20.3)             |          | 1803 (21.2)               | 1708 (20.1)             |        |
| ≤6 hrs                             | 350 (0.7)                  | 79 (0.9)                | 67 (0.8) | 62 (0.7)                  |                         |        |
| Mitral regurgitation - no. (%)     |                            |                         | 0.16     |                           |                         | 0.02   |
| None                               | 33929 (66.9)               | 5425 (62.2)             |          | 5277 (62.1)               | 5275 (62.1)             |        |
| Trivial                            | 5479 (10.8)                | 1355 (15.5)             |          | 1271 (15.0)               | 1323 (15.6)             |        |
| Mild                               | 6805 (13.4)                | 1237 (14.2)             |          | 1246 (14.7)               | 1208 (14.2)             |        |
| Moderate                           | 2162 (4.3)                 | 411 (4.7)               |          | 400 (4.7)                 | 397 (4.7)               |        |
| Severe                             | 213 (0.4)                  | 33 (0.4)                | 33 (0.4) | 31 (0.4)                  |                         |        |
| Cardiogenic shock - no. (%)        | 533 (1.1)                  | 101 (1.2)               | 0.01     | 75 (0.9)                  | 78 (0.9)                | 0.004  |
| CPR - no. (%)                      | 224 (0.4)                  | 35 (0.4)                | 0.009    | 34 (0.4)                  | 26 (0.3)                | 0.02   |
| Atrial fibrillation - no. (%)      | 14119 (27.8)               | 2684 (30.8)             | 0.06     | 2574 (30.3)               | 2610 (30.7)             | 0.009  |
| Liver disease - no. (%)            | 2622 (5.2)                 | 312 (3.6)               | 0.08     | 314 (3.7)                 | 300 (3.5)               | 0.009  |



**Supplemental Table 5. Baseline Characteristics of the Study Population Before and After Near-Far Matching (continued)\***

| Characteristic                              | Before Matching |             |       | After Matching |             |        |
|---------------------------------------------|-----------------|-------------|-------|----------------|-------------|--------|
|                                             | Unencouraged    | Encouraged  |       | Unencouraged   | Encouraged  |        |
|                                             | (N=50,708)      | (N=8,724)   | SMD   | (N=8,491)      | (N=8,491)   | SMD    |
| Cancer - no. (%)                            | 1803 (3.6)      | 313 (3.6)   | 0.002 | 305 (3.6)      | 300 (3.5)   | 0.003  |
| Osteoporosis - no. (%)                      | 1309 (2.6)      | 183 (2.1)   | 0.03  | 153 (1.8)      | 173 (2.0)   | 0.02   |
| Hip fracture - no. (%)                      | 205 (0.4)       | 24 (0.3)    | 0.02  | 15 (0.2)       | 23 (0.3)    | 0.02   |
| Malnutrition - no. (%)                      | 1701 (3.4)      | 151 (1.7)   | 0.10  | 145 (1.7)      | 144 (1.7)   | 0.001  |
| Anemia - no. (%)                            | 23458 (46.3)    | 4450 (51.0) | 0.10  | 4169 (49.1)    | 4344 (51.2) | 0.04   |
| Hypothyroidism - no. (%)                    | 4737 (9.3)      | 837 (9.6)   | 0.009 | 768 (9.0)      | 812 (9.6)   | 0.02   |
| Asthma - no. (%)                            | 3484 (6.9)      | 595 (6.8)   | 0.002 | 546 (6.4)      | 566 (6.7)   | 0.01   |
| Dementia - no. (%)                          | 306 (0.6)       | 34 (0.4)    | 0.03  | 29 (0.3)       | 33 (0.4)    | 0.008  |
| Immunosuppressed - no. (%)                  | 1104 (2.2)      | 214 (2.5)   | 0.02  | 196 (2.3)      | 203 (2.4)   | 0.02   |
| Surgical status - no. (%)                   |                 |             |       |                |             |        |
| Elective                                    | 17959 (35.4)    | 3682 (42.2) | 0.15  | 3619 (42.6)    | 3619 (42.6) | <0.001 |
| Urgent                                      | 30882 (60.9)    | 4681 (53.7) |       | 4614 (54.3)    | 4614 (54.3) |        |
| Emergent                                    | 1854 (3.7)      | 355 (4.1)   |       | 258 (3.0)      | 258 (3.0)   |        |
| Emergent salvage                            | 11 (0.0)        | 6 (0.1)     |       | 0 (0)          | 0 (0)       |        |
| Redo sternotomy - no. (%)                   | 71 (0.1)        | 18 (0.2)    | 0.02  | 11 (0.1)       | 17 (0.2)    | 0.02   |
| ≥3 vessel disease - no. (%)                 | 41268 (81.4)    | 7070 (81.0) | 0.009 | 6926 (81.6)    | 6926 (81.6) | <0.001 |
| Surgeon volume - isolated CABG cases        | 336 ± 182       | 312 ± 153   | 0.14  | 333 ± 183      | 312 ± 153   | 0.12   |
| Surgeon use of second arterial conduits - % | 4.0 ± 5.0       | 44.0 ± 19.0 | 2.92  | 1.0 ± 1.0      | 44.0 ± 19.0 | 3.20   |

\*Plus-minus values are means +/- standard deviation. 4% of patients missing data for mitral regurgitation, otherwise no variable with >0.2% missingness. If any missing data present, groups were balanced on missingness for each variable. CABG, coronary artery bypass grafting; CPR, cardiopulmonary resuscitation; MI, myocardial infarction; PCI, percutaneous coronary intervention; PVD, peripheral vascular disease; SMD, standardized mean difference

**Supplemental Table 6. Baseline Characteristics of the Study Population Before and After Propensity Score Matching for Comparison of Right Internal Thoracic Artery vs. Radial Artery Conduits\***

| Characteristic                     | Before Matching |              |        | After Matching <sup>†</sup> |               |       |
|------------------------------------|-----------------|--------------|--------|-----------------------------|---------------|-------|
|                                    | Radial Artery   | Right ITA    |        | Radial Artery               | Right ITA     |       |
|                                    | (N=4,290)       | (N=1,576)    | SMD    | (N=4,272.5)                 | (N=1,569.6)   | SMD   |
| Age - yr                           | 62.5 ± 10.4     | 60.8 ± 10.5  | 0.16   | 62.1 ± 10.5                 | 61.7 ± 10.3   | 0.04  |
| Year of surgery - yr               | 2008.1 ± 1.6    | 2008.1 ± 1.6 | <0.001 | 2008.1 ± 1.6                | 2008.1 ± 1.6  | 0.002 |
| Male sex - no. (%)                 | 3659 (85.3)     | 1344 (85.3)  | <0.001 | 3654.0 (85.5)               | 1345.5 (85.7) | 0.006 |
| Race - no. (%)                     |                 |              |        |                             |               |       |
| Unknown                            | 57 (1.3)        | 9 (0.6)      | 0.18   | 49.3 (1.2)                  | 13.2 (0.8)    | 0.05  |
| White                              | 3051 (71.1)     | 1139 (72.3)  |        | 3063.6 (71.7)               | 1125.4 (71.7) |       |
| Black                              | 122 (2.8)       | 24 (1.5)     |        | 90.0 (2.1)                  | 33.0 (2.1)    |       |
| Hispanic                           | 492 (11.5)      | 173 (11.0)   |        | 486.3 (11.4)                | 178.7 (11.4)  |       |
| Asian                              | 461 (10.7)      | 157 (10.0)   |        | 458.5 (10.7)                | 162.3 (10.3)  |       |
| Native American                    | 10 (0.2)        | 2 (0.1)      |        | 9.8 (0.2)                   | 3.2 (0.2)     |       |
| Other                              | 97 (2.3)        | 72 (4.6)     |        | 115.1 (2.7)                 | 53.7 (3.4)    |       |
| Height - cm                        | 173.2 ± 9.5     | 173.7 ± 9.6  | 0.06   | 173.3 ± 9.5                 | 173.4 ± 9.6   | 0.01  |
| Weight - kg                        | 89.2 ± 19.1     | 85.6 ± 17.0  | 0.20   | 88.4 ± 18.7                 | 87.4 ± 17.5   | 0.05  |
| Ejection fraction - %              | 55.5 ± 12.0     | 56.0 ± 12.1  | 0.05   | 55.5 ± 12.0                 | 56.1 ± 12.0   | 0.05  |
| Creatinine - mg/dL                 | 1.06 ± 0.41     | 1.12 ± 0.80  | 0.10   | 1.06 ± 0.43                 | 1.10 ± 0.69   | 0.06  |
| Dialysis - no. (%)                 | 25 (0.6)        | 23 (1.5)     | 0.09   | 27.5 (0.6)                  | 12.9 (0.8)    | 0.02  |
| Diabetes mellitus - no. (%)        | 1681 (39.2)     | 396 (25.1)   | 0.30   | 1525.1 (35.7)               | 528.2 (33.7)  | 0.04  |
| Hypertension - no. (%)             | 3528 (82.2)     | 1216 (77.2)  | 0.13   | 3454.6 (80.9)               | 1249.0 (79.6) | 0.03  |
| PVD - no. (%)                      | 376 (8.8)       | 182 (11.5)   | 0.09   | 401.9 (9.4)                 | 143.7 (9.2)   | 0.009 |
| Cerebrovascular disease - no. (%)  | 379 (8.8)       | 152 (9.6)    | 0.03   | 383.9 (9.0)                 | 149.4 (9.5)   | 0.02  |
| Chronic lung disease - no. (%)     |                 |              |        |                             |               |       |
| None                               | 3717 (86.6)     | 1266 (80.3)  | 0.21   | 3639.2 (85.2)               | 1324.3 (84.4) | 0.05  |
| Mild                               | 414 (9.7)       | 178 (11.3)   |        | 439.4 (10.3)                | 160.9 (10.3)  |       |
| Moderate                           | 104 (2.4)       | 81 (5.1)     |        | 125.4 (2.9)                 | 52.4 (3.3)    |       |
| Severe                             | 55 (1.3)        | 49 (3.1)     |        | 68.5 (1.6)                  | 30.9 (2.0)    |       |
| Congestive heart failure - no. (%) | 408 (9.5)       | 175 (11.1)   | 0.05   | 416.0 (9.7)                 | 158.0 (10.1)  | 0.01  |
| Prior MI - no. (%)                 |                 |              |        |                             |               |       |
| None                               | 2360 (55.0)     | 972 (61.7)   | 0.21   | 2424.8 (56.8)               | 909.4 (57.9)  | 0.05  |
| >21 days                           | 749 (17.5)      | 261 (16.6)   |        | 735.4 (17.2)                | 259.8 (16.6)  |       |
| 8 to 21 days                       | 100 (2.3)       | 43 (2.7)     |        | 104.5 (2.4)                 | 45.7 (2.9)    |       |
| 1 to 7 days                        | 999 (23.3)      | 258 (16.4)   |        | 922.5 (21.6)                | 319.4 (20.4)  |       |
| >6 hrs but <24 hrs                 | 41 (0.9)        | 29 (1.8)     |        | 45.4 (1.0)                  | 20.7 (1.3)    |       |
| ≤6 hrs                             | 26 (0.6)        | 10 (0.6)     |        | 26.8 (0.6)                  | 10.2 (0.7)    |       |
| Prior PCI - no. (%)                |                 |              |        |                             |               |       |
| None                               | 3420 (79.7)     | 1271 (80.6)  | 0.03   | 3419.5 (80.0)               | 1268.4 (80.8) | 0.02  |
| >6 hrs                             | 856 (20.0)      | 298 (18.9)   |        | 837.1 (19.6)                | 296.1 (18.9)  |       |
| ≤6 hrs                             | 14 (0.3)        | 7 (0.4)      |        | 15.9 (0.4)                  | 5.1 (0.3)     |       |
| Mitral regurgitation - no. (%)     |                 |              |        |                             |               |       |
| None                               | 2899 (67.6)     | 1088 (69.0)  | 0.11   | 2898.1 (67.8)               | 1061.8 (67.6) | 0.03  |
| Trivial                            | 628 (14.6)      | 200 (12.7)   |        | 612.0 (14.3)                | 216.8 (13.8)  |       |
| Mild                               | 499 (11.6)      | 161 (10.2)   |        | 482.9 (11.3)                | 179.2 (11.4)  |       |
| Moderate                           | 114 (2.7)       | 45 (2.9)     |        | 114.9 (2.7)                 | 49.7 (3.2)    |       |
| Severe                             | 8 (0.2)         | 3 (0.2)      |        | 8.0 (0.2)                   | 3.0 (0.2)     |       |
| Cardiogenic shock - no. (%)        | 11 (0.3)        | 7 (0.4)      | 0.03   | 12.6 (0.3)                  | 5.4 (0.3)     | 0.009 |
| CPR - no. (%)                      | 10 (0.2)        | 2 (0.1)      | 0.03   | 8.7 (0.2)                   | 1.1 (0.1)     | 0.04  |

**Supplemental Table 6. Baseline Characteristics of the Study Population Before and After Propensity Score Matching for Comparison of Right Internal Thoracic Artery vs. Radial Artery Conduits (continued)\***

| Characteristic                       | Before Matching            |                        |       | After Matching <sup>†</sup>  |                          |        |
|--------------------------------------|----------------------------|------------------------|-------|------------------------------|--------------------------|--------|
|                                      | Radial Artery<br>(N=4,290) | Right ITA<br>(N=1,576) | SMD   | Radial Artery<br>(N=4,272.5) | Right ITA<br>(N=1,569.6) | SMD    |
| Atrial fibrillation - no. (%)        | 1149 (26.8)                | 376 (23.9)             | 0.07  | 1112.6 (26.0)                | 386.3 (24.6)             | 0.03   |
| Liver disease - no. (%)              | 141 (3.3)                  | 56 (3.6)               | 0.02  | 139.3 (3.3)                  | 51.9 (3.3)               | 0.002  |
| Cancer - no. (%)                     | 110 (2.6)                  | 35 (2.2)               | 0.02  | 106.3 (2.5)                  | 37.6 (2.4)               | 0.006  |
| Osteoporosis - no. (%)               | 57 (1.3)                   | 19 (1.2)               | 0.01  | 55.1 (1.3)                   | 21.5 (1.4)               | 0.007  |
| Hip fracture - no. (%)               | 7 (0.2)                    | 3 (0.2)                | 0.006 | 6.6 (0.2)                    | 3.0 (0.2)                | 0.008  |
| Malnutrition - no. (%)               | 48 (1.1)                   | 42 (2.7)               | 0.11  | 57.8 (1.4)                   | 30.9 (2.0)               | 0.05   |
| Anemia - no. (%)                     | 2175 (50.7)                | 637 (40.4)             | 0.21  | 2039.6 (47.7)                | 726.7 (46.3)             | 0.03   |
| Hypothyroidism - no. (%)             | 312 (7.3)                  | 120 (7.6)              | 0.01  | 314.6 (7.4)                  | 103.4 (6.6)              | 0.03   |
| Asthma - no. (%)                     | 271 (6.3)                  | 86 (5.5)               | 0.04  | 262.1 (6.1)                  | 88.1 (5.6)               | 0.02   |
| Dementia - no. (%)                   | 8 (0.2)                    | 4 (0.3)                | 0.01  | 9.0 (0.2)                    | 3.8 (0.2)                | 0.006  |
| Immunosuppressed - no. (%)           | 63 (1.5)                   | 27 (1.7)               | 0.02  | 65.4 (1.5)                   | 21.5 (1.4)               | 0.01   |
| Surgical status - no. (%)            |                            |                        |       |                              |                          |        |
| Elective                             | 1794 (41.8)                | 745 (47.3)             | 0.16  | 1842.2 (43.1)                | 676.8 (43.1)             | <0.001 |
| Urgent                               | 2428 (56.6)                | 785 (49.8)             |       | 2349.8 (55.0)                | 863.2 (55.0)             |        |
| Emergent                             | 67 (1.6)                   | 46 (2.9)               |       | 80.4 (1.9)                   | 29.6 (1.9)               |        |
| Emergent salvage                     | 1 (0.0)                    | 0 (0.0)                |       | 0 (0)                        | 0 (0)                    |        |
| Redo sternotomy - no. (%)            | 7 (0.2)                    | 4 (0.3)                | 0.02  | 7.3 (0.2)                    | 2.1 (0.1)                | 0.008  |
| ≥3 vessel disease - no. (%)          | 3547 (82.7)                | 1297 (82.3)            | 0.01  | 3520.7 (82.4)                | 1308.1 (83.3)            | 0.03   |
| Surgeon volume - isolated CABG cases | 328 ± 161                  | 305 ± 171              | 0.13  | 322 ± 161                    | 317 ± 172                | 0.03   |

\*Plus-minus values are means +/- standard deviation. 4% of patients missing data for mitral regurgitation, otherwise no variable with >0.2% missingness. If any missing data present, groups were balanced on missingness for each variable. CABG, coronary artery bypass grafting; CPR, cardiopulmonary resuscitation; ITA, internal thoracic artery; MI, myocardial infarction; PCI, percutaneous coronary intervention; PVD, peripheral vascular disease; SMD, standardized mean difference

<sup>†</sup>The number of patients and proportions presented are weighted due to variable 1:k matching and for estimation of the average treatment effect. Total number matched: radial artery = 4,268; right internal thoracic artery = 1,574; 24 of 5,866 (0.4%) patients unmatched

**Supplemental Figure 1. Distribution of Propensity Scores, Stratified by Number of Diseased Vessels and Comparison of Interest**

**A Two-vessel disease: second arterial vs. venous conduit**

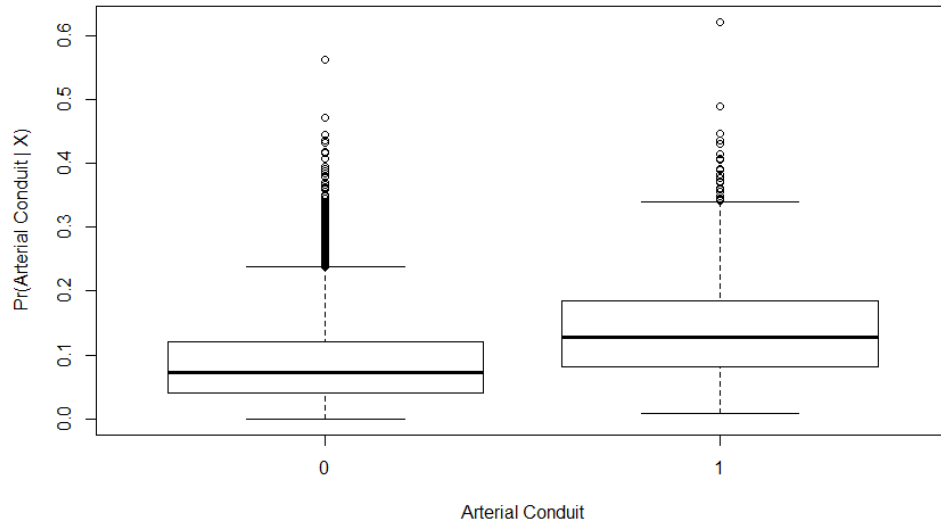

**B Three-or-more vessel disease: second arterial vs. venous conduit**

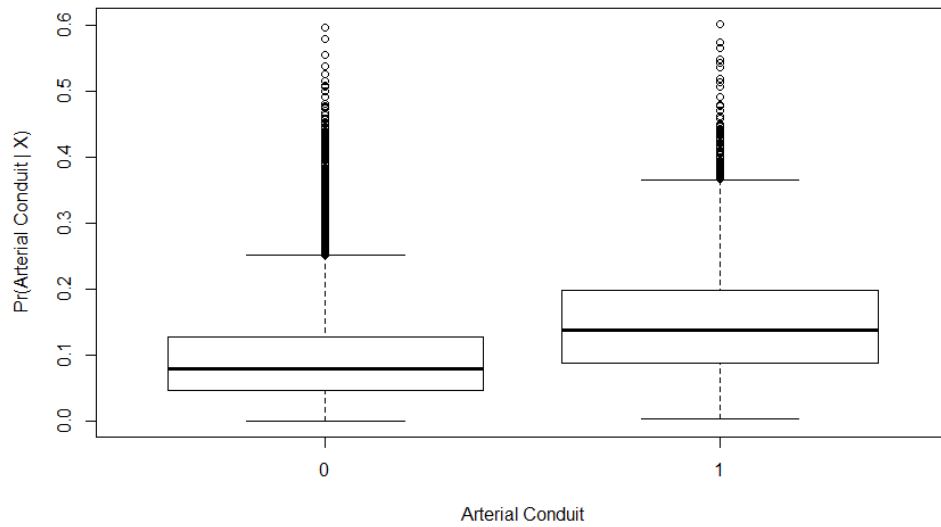

**C Right internal thoracic artery vs. radial artery**

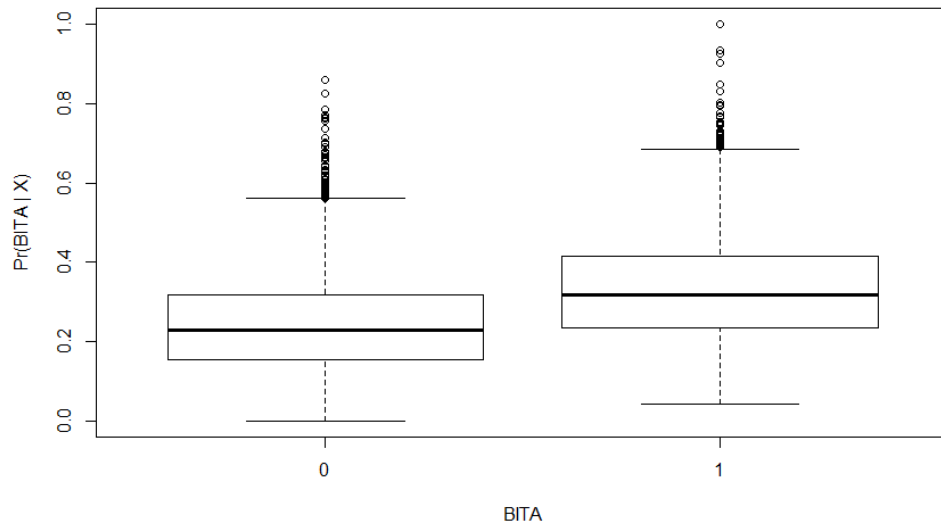

0=No, 1=Yes; BITA, bilateral internal thoracic artery grafts

**Supplemental Figure 2. Distribution of Weights for Comparison of Second Arterial Conduit vs. Venous Conduit and for Right Internal Thoracic Artery Conduit vs. Radial Artery Conduit\***

**A Second arterial vs. venous conduit†**

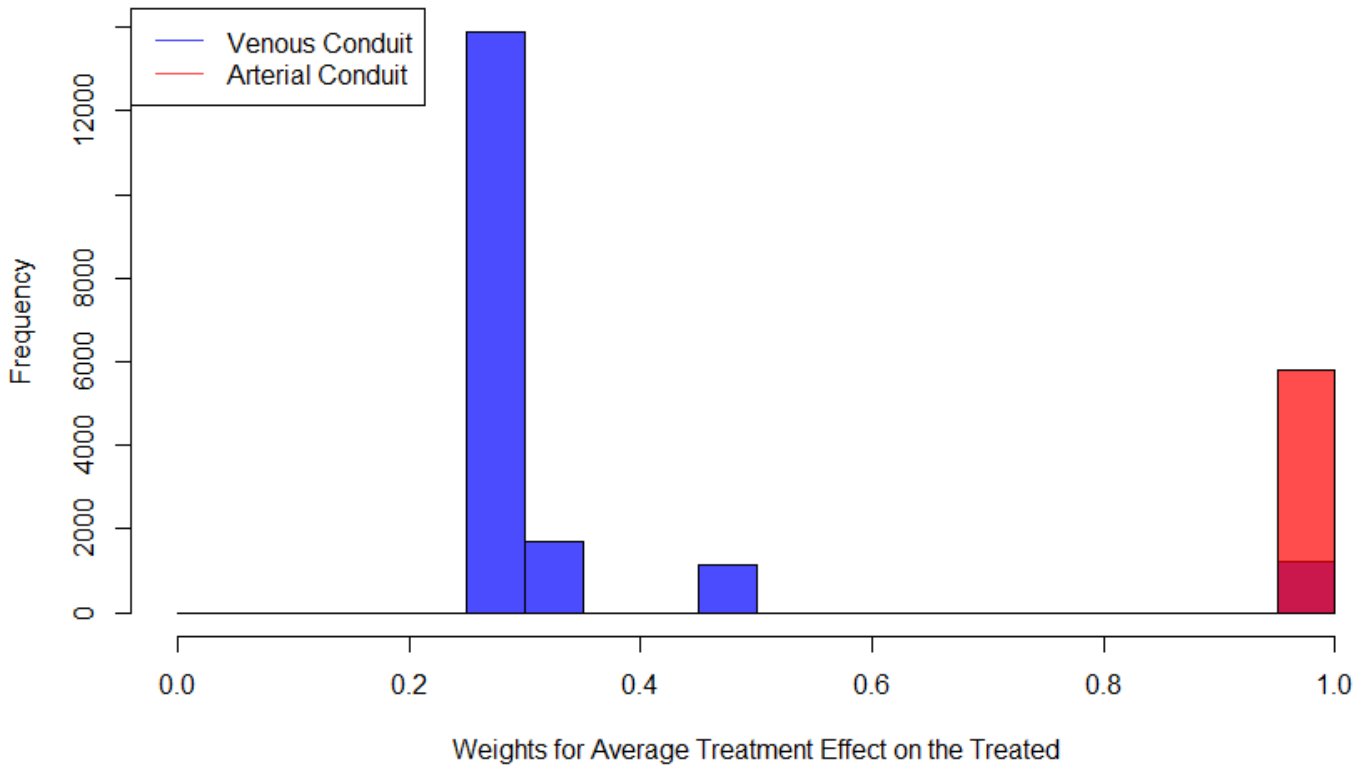

**B Right internal thoracic artery vs. radial artery conduit**

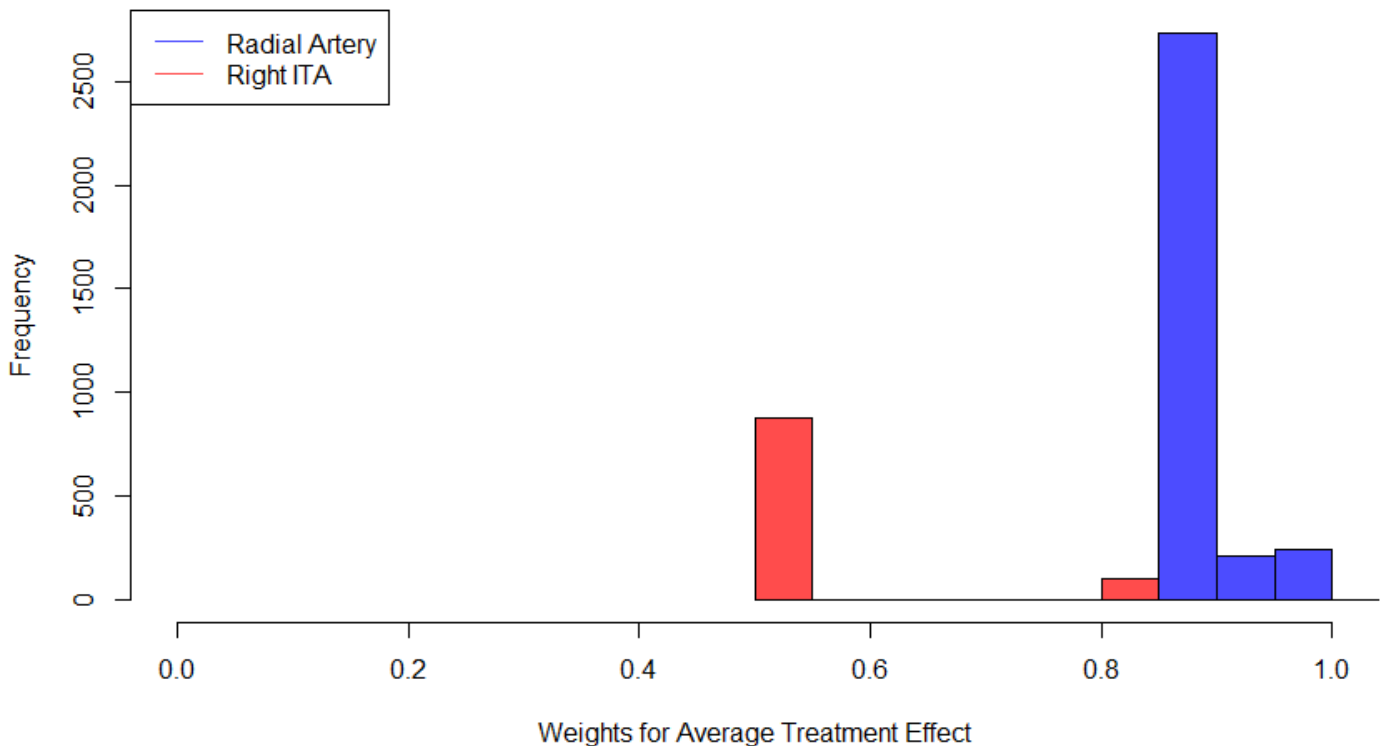

†Dark red represents part of bin that is overlapping between groups.

\*All weights for patients in the second arterial conduit group (treated) received a weight of 1 to estimate the average treatment effect on the treated. ITA, internal thoracic artery

### Supplemental Figure 3. Distribution of Surgeon Utilization of Second Arterial Conduits and of Patients Presenting to Surgeons who Use Second Arterial Conduits at Varying Rates

#### A Surgeon utilization of second arterial conduits

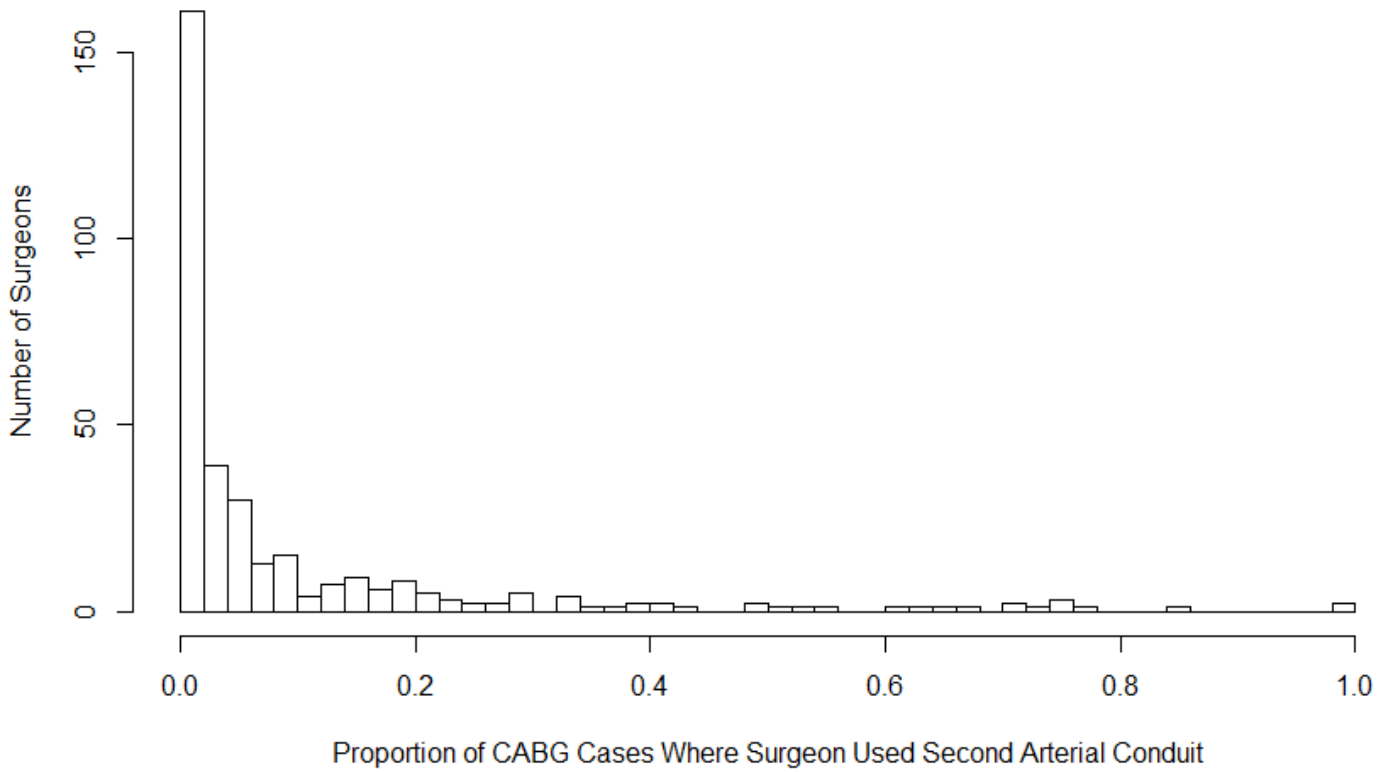

#### B Patients who presented to surgeons of varying rates of second arterial conduit use

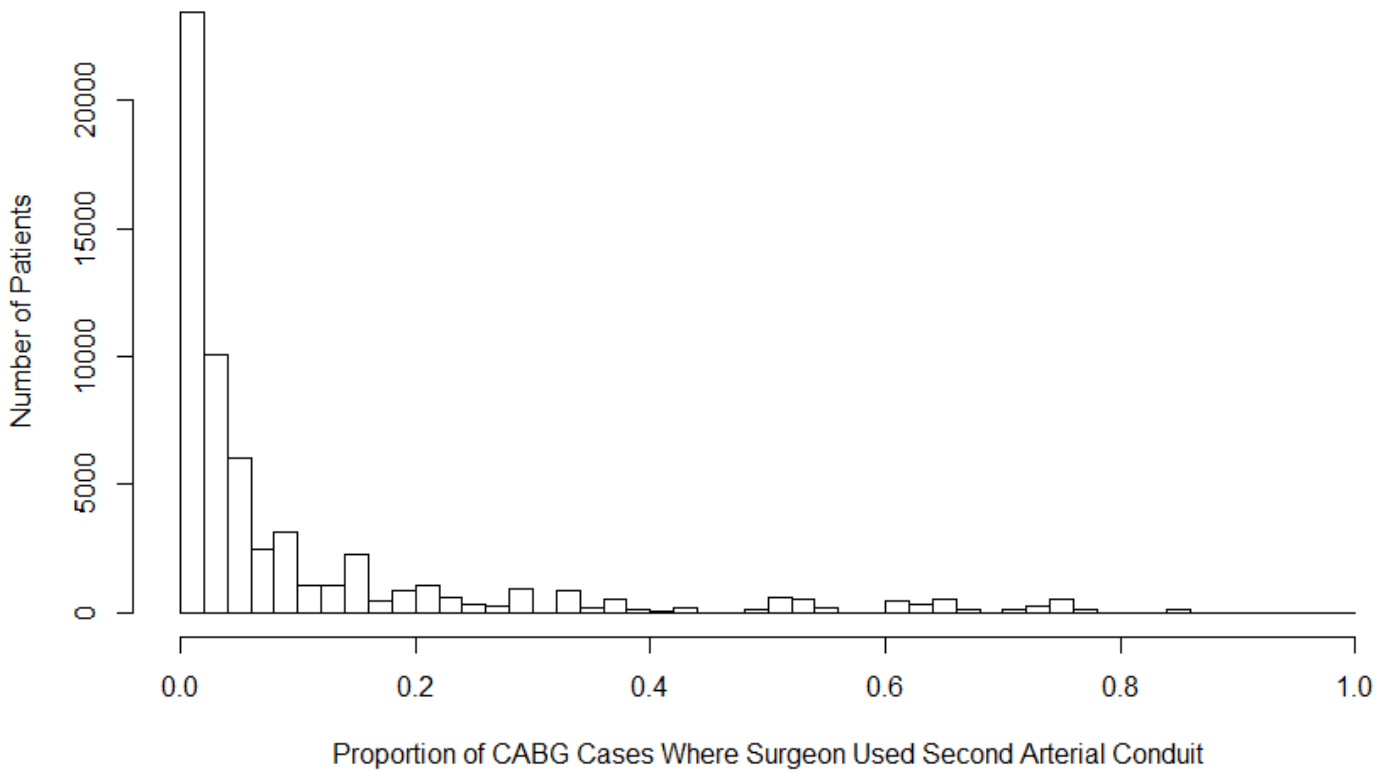

**Supplemental Figure 4. Use of Second Arterial Conduits During the Study Period\***

**A Second arterial conduit vs. venous conduit**

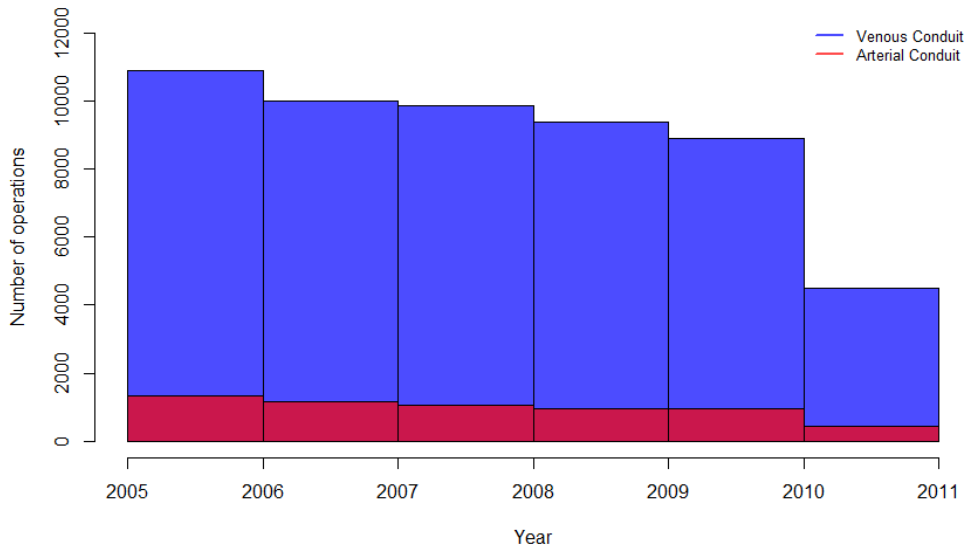

**B Bilateral internal thoracic arteries vs. left internal thoracic artery**

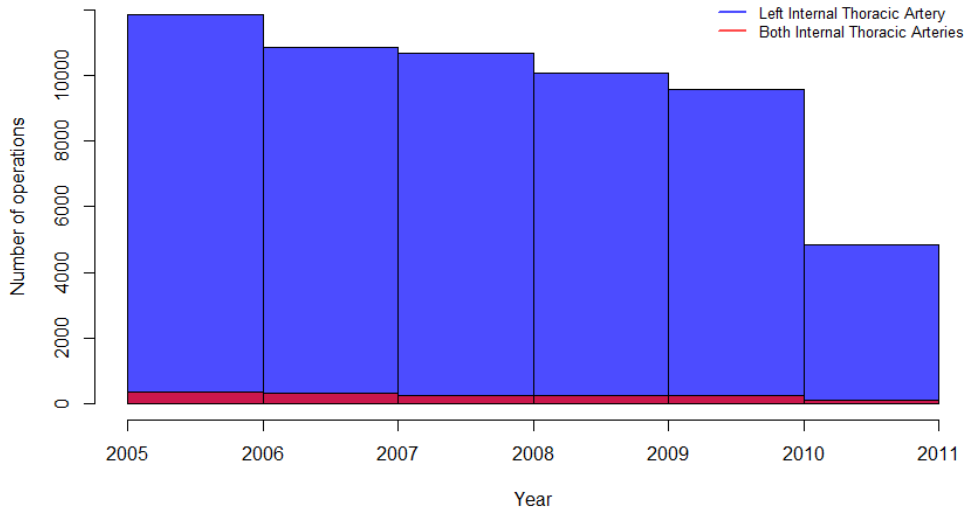

**C Radial artery vs. no radial artery**

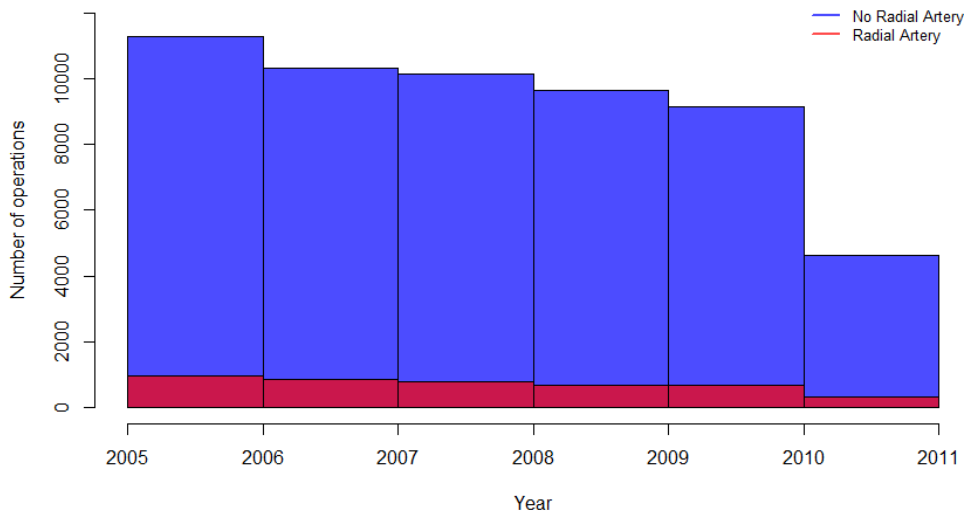

\*Data for 2011 is truncated at July 1, 2011 (the last date of study entry).

**Supplemental Figure 5. Net Survival Penalty or Benefit of Second Arterial Conduits Over Time (Additional Area Under the Survival Curve)**

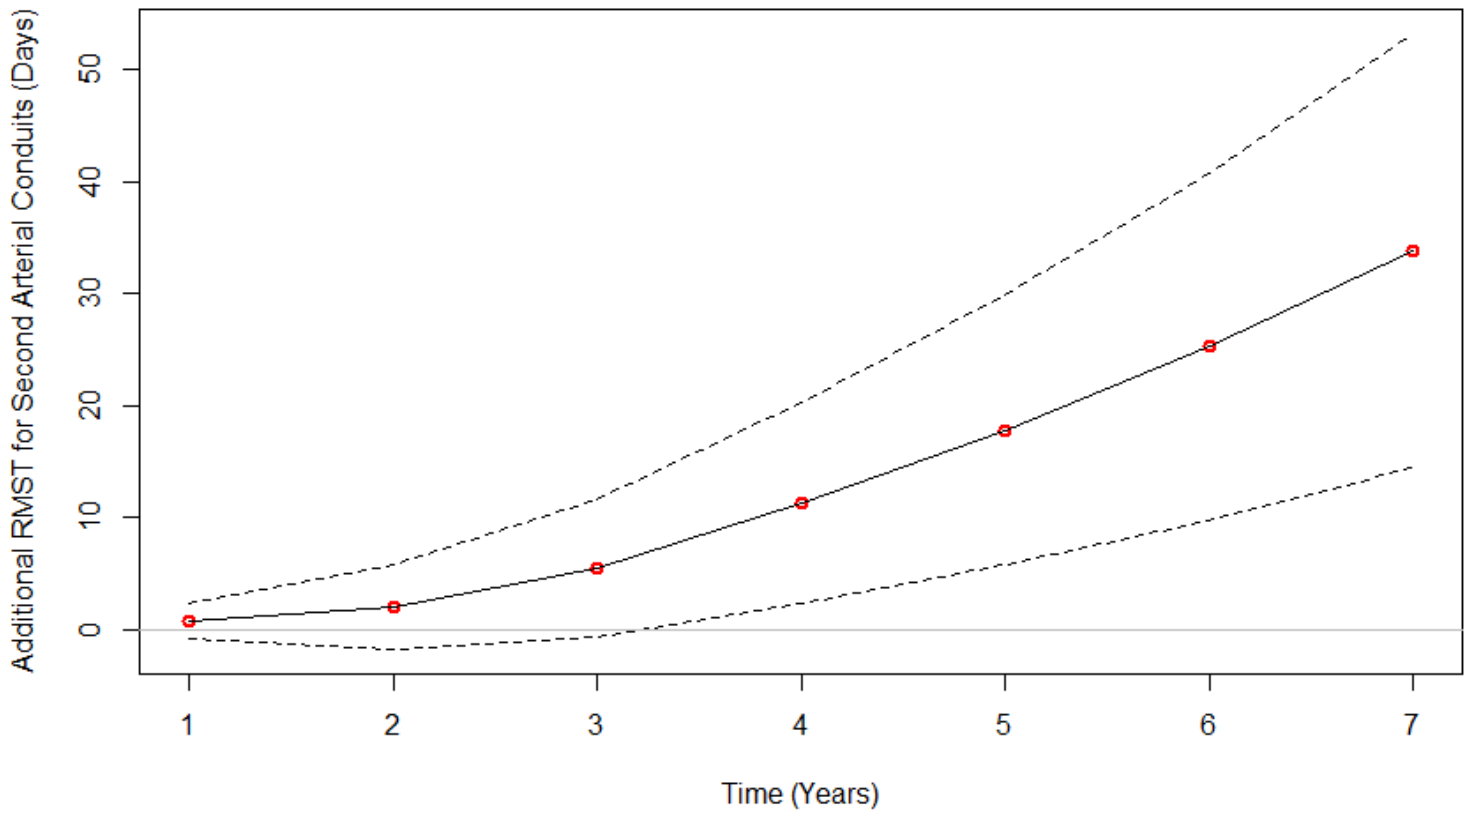

Red circles represent point estimates of the difference in restricted mean survival time between recipients of second arterial conduits vs. venous conduits each year after surgery. Dashed lines are 95% confidence intervals.



**Supplemental Figure 6. Mortality and Major Adverse Cardiovascular and Cerebrovascular Events after Coronary Artery Bypass Surgery - Instrumental Variable Analysis**

**A Mortality**

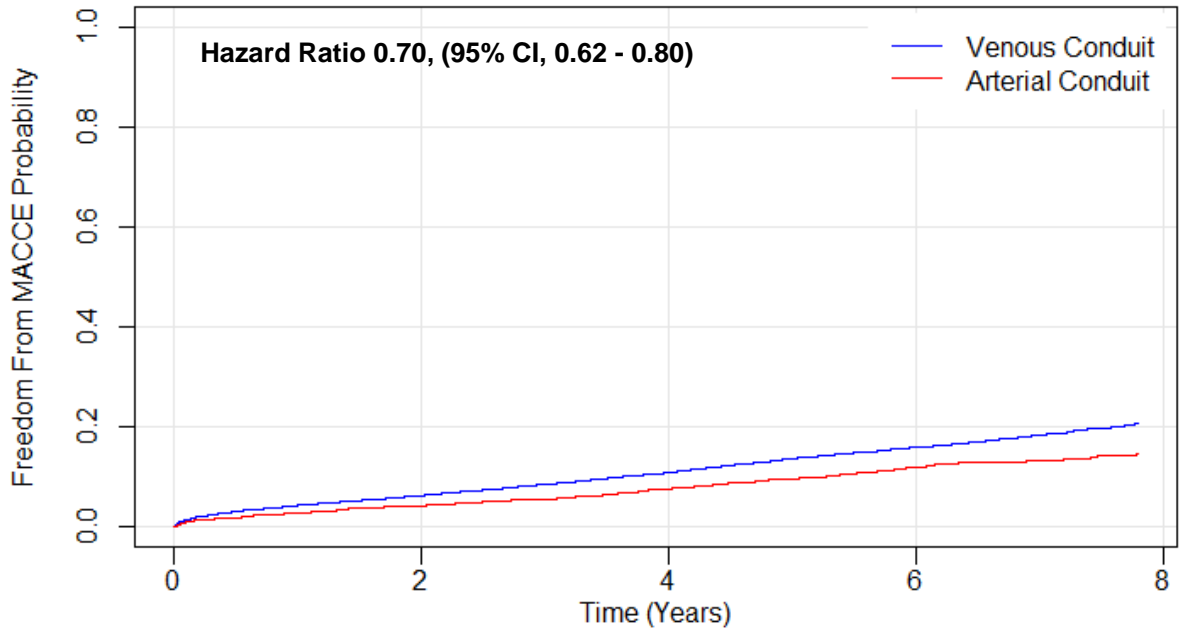

|                  |       |       |      |      |    |
|------------------|-------|-------|------|------|----|
| Venous Conduit   | 13096 | 12206 | 8726 | 4090 | 27 |
| Arterial Conduit | 3886  | 3756  | 2836 | 1514 | 8  |

**B MACCE**

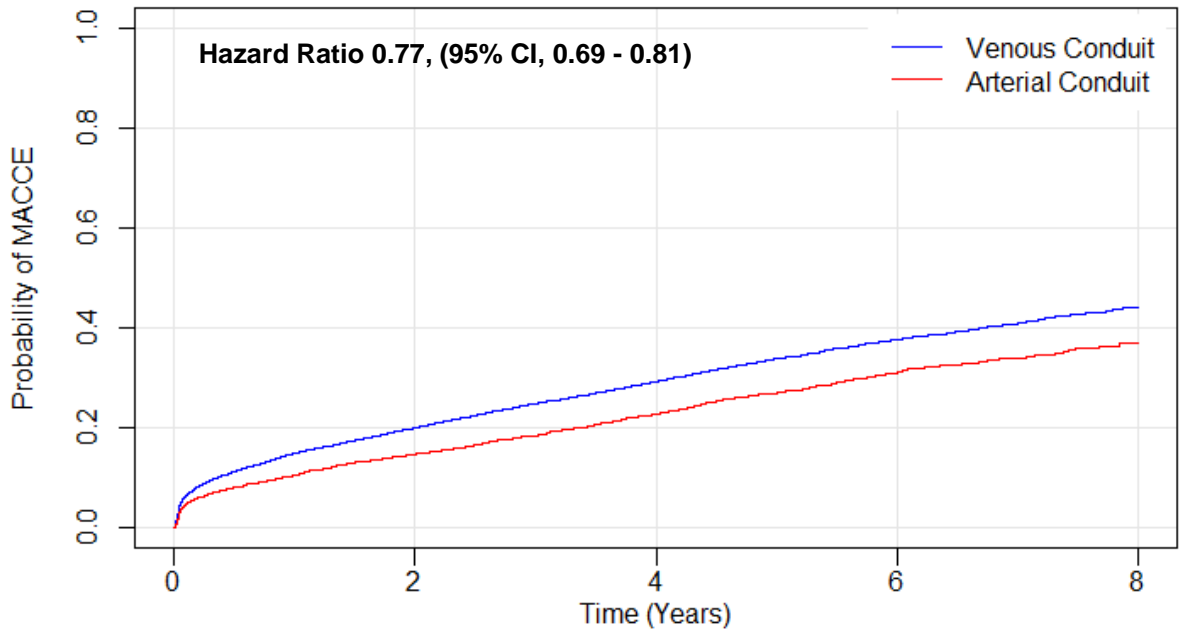

|                  |       |       |      |      |    |
|------------------|-------|-------|------|------|----|
| Venous Conduit   | 13096 | 10368 | 6922 | 3070 | 19 |
| Arterial Conduit | 3886  | 3381  | 2410 | 1215 | 6  |

**Supplemental Figure 7. Mortality after Coronary Artery Bypass Surgery with a Second Arterial vs. Venous Conduit Stratified by Number of Diseased Vessels**

**A Two-vessel disease**

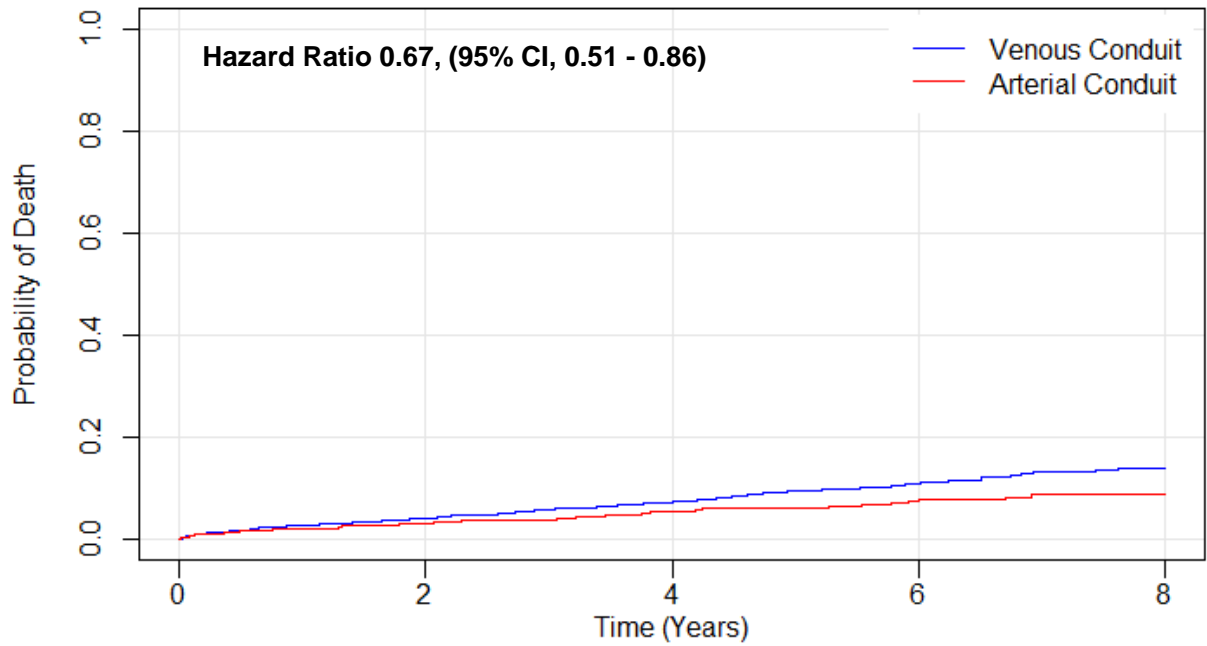

|                  |   |      |       |       |       |     |
|------------------|---|------|-------|-------|-------|-----|
| Venous Conduit   | — | 1003 | 960.6 | 720.7 | 366.4 | 1.8 |
| Arterial Conduit | — | 1003 | 971   | 724   | 399   | 3   |

**B Three-or-more vessel disease**

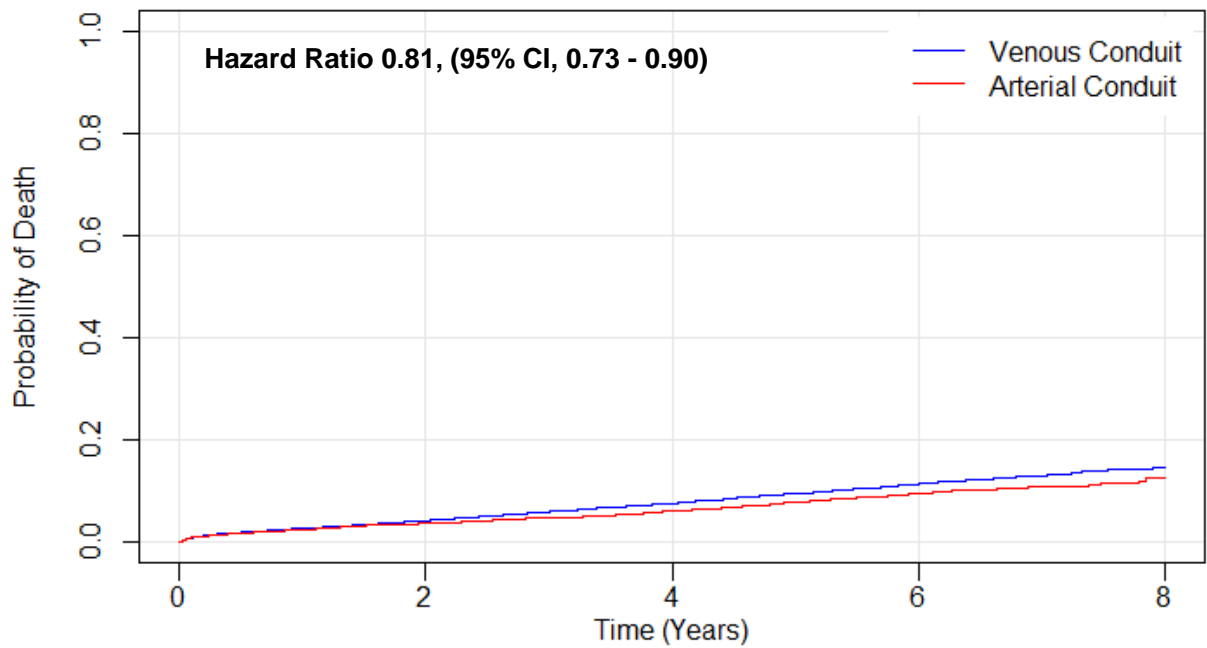

|                  |   |      |        |        |        |      |
|------------------|---|------|--------|--------|--------|------|
| Venous Conduit   | — | 4810 | 4601.3 | 3423.4 | 1685.2 | 10.5 |
| Arterial Conduit | — | 4810 | 4631   | 3449   | 1806   | 15   |

**Supplemental Figure 8. Competing Risks of Myocardial Infarction, Repeat Revascularization, or Stroke with Death, Stratified by Second Conduit Type**

**A Myocardial infarction**

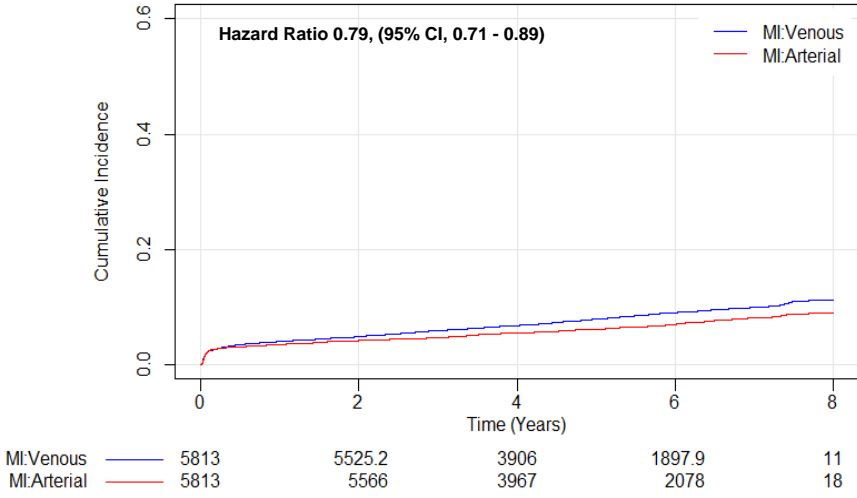

**B Repeat revascularization**

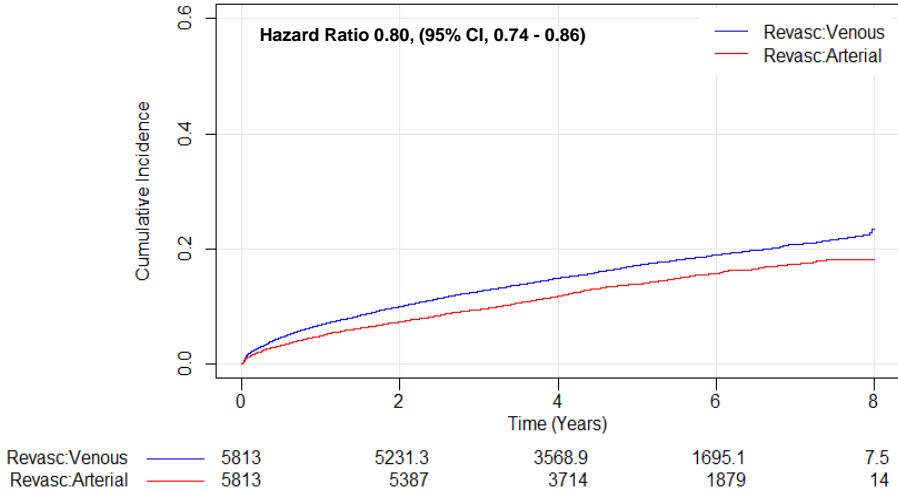

**C Stroke**

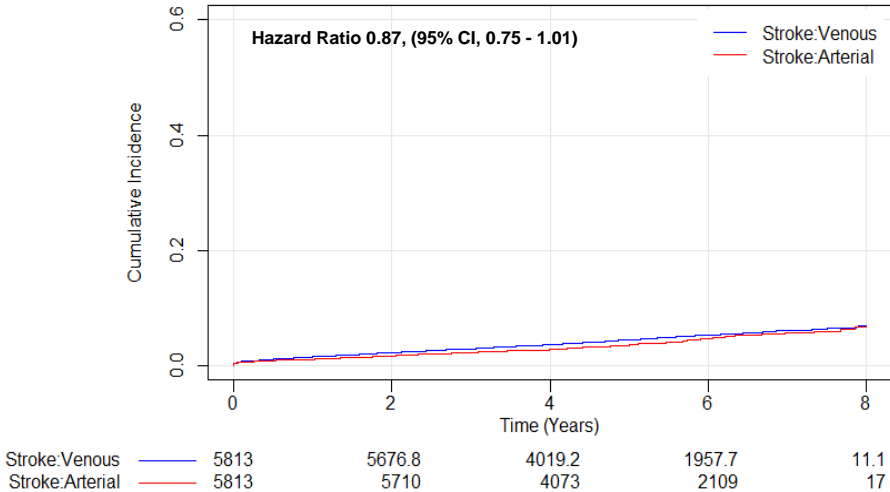

**Supplemental Figure 9. Competing Risks of Myocardial Infarction, Repeat Revascularization, or Stroke with Death Among Recipients of Right Internal Thoracic Artery vs. Radial Artery Conduits**

**A Myocardial infarction**

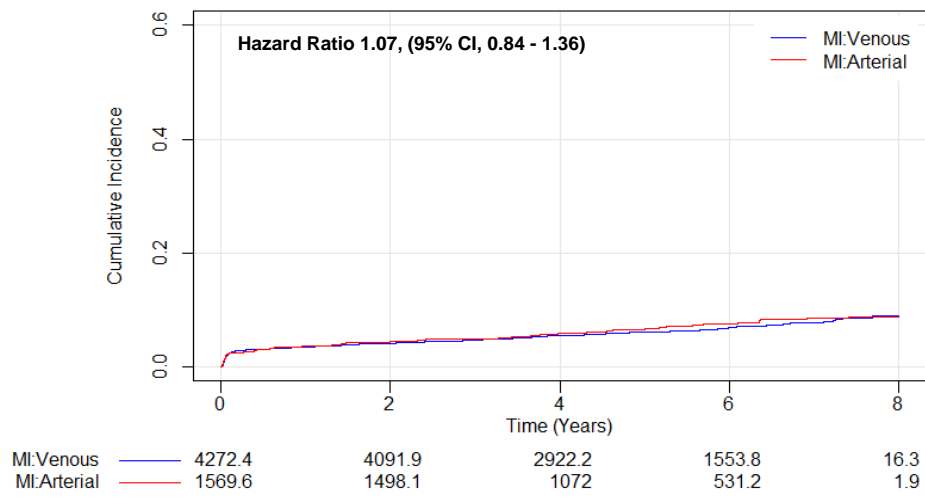

**B Repeat revascularization**

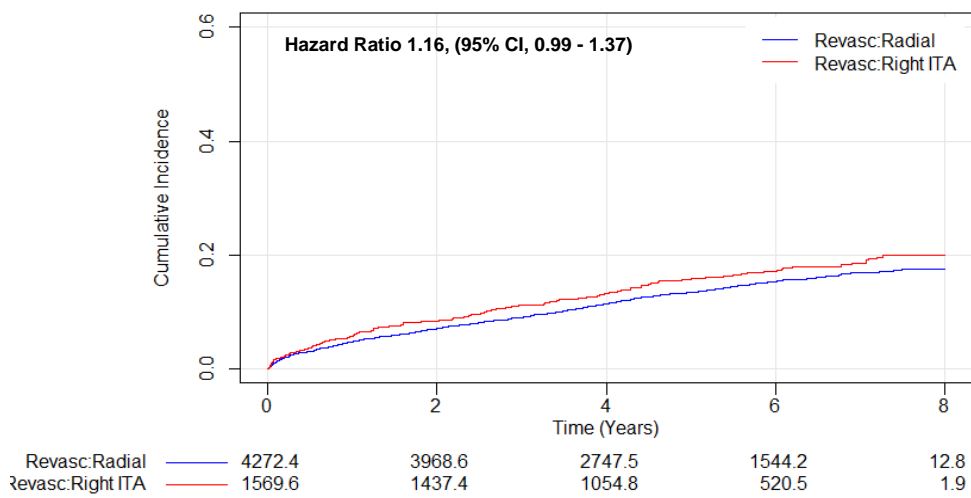

**C Stroke**

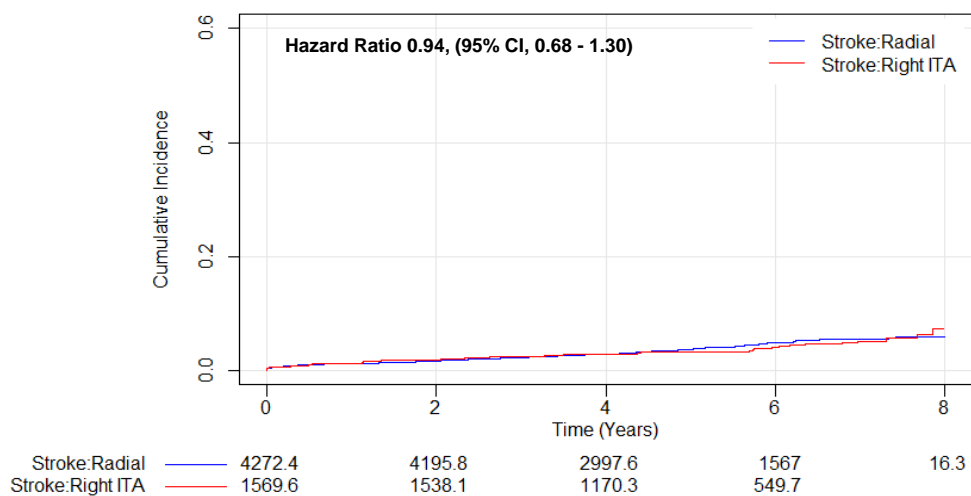

## SUPPLEMENTAL REFERENCES

1. Rosenbaum P, Rubin D. The central role of the propensity score in observational studies. *Biometrika*. 1983;70:41-55.
2. Ming K, Rosenbaum PR. A note on optimal matching with variable controls using the assignment algorithm. *J Comp Graph Stat*. 2001;10:455-463.
3. Stuart EA. Matching methods for causal inference: A review and a look forward. *Stat Sci*. 2010;25:1-21.
4. Austin PC, Stuart EA. The performance of inverse probability of treatment weighting and full matching on the propensity score in the presence of model misspecification when estimating the effect of treatment on survival outcomes. *Stat Methods Med Res*. 2017;26:1654-1670.
5. California Office of Statewide Health Planning and Development. Types of OSHPD Patient-Level Data. [http://www.oshpd.ca.gov/HID/Data\\_Request\\_Center/Types\\_of\\_Data.html](http://www.oshpd.ca.gov/HID/Data_Request_Center/Types_of_Data.html). Accessed March 15, 2017.
6. Baiocchi M, Cheng J, Small DS. Instrumental variable methods for causal inference. *Stat Med*. Jun 15 2014;33:2297-2340.
7. Jiang Y, Kang H, Small D. ivmodel: Statistical Inference and Sensitivity Analysis for Instrumental Variables Model. R package version 1.2. 2016.
8. Baiocchi M, Small DS, Lorch S, Rosenbaum PR. Building a stronger instrument in an observational study of perinatal care for premature infants. *J Am Stat Assoc*. 2010;105:1285-1296.
9. Terza JV, Basu A, Rathouz PJ. Two-stage residual inclusion estimation: addressing endogeneity in health econometric modeling. *J Health Econ*. 2008;27:531-543.
10. Rosenbaum PR. Sensitivity analysis for m-estimates, tests and confidence intervals in matched observational studies. *Biometrics*. 2007;63:456-464.
11. Rosenbaum PR. *Observational studies*. 2nd ed. New York: Springer; 2002.
12. Rosenbaum PR, Silber JH. Amplification of Sensitivity Analysis in Matched Observational Studies. *J Am Stat Assoc*. 2009;104:1398-1405.
13. Lumley T. Analysis of complex survey samples. *J Stat Softw*. 2004;9:1-19.
14. Hothorn T, Hornik K, van de Wiel MA, Zeileis A. Implementing a class of permutation tests: the coin package. *J Stat Softw*. 2008;28:1-23.
15. Therneau TM, Grambsch PM. *Modeling Survival Data: Extending the Cox Model*. New York: Springer; 2000.
16. Uno H, Tian L, Cronin A, Battioui C. survRM2: Comparing Restricted mean Survival Time. R package version 1.0-1. 2015.
17. Rosenbaum PR. Sensitivitymv: Sensitivity analysis in observational studies. R package version 1.3. 2015.
